# Supplementary material for: Review article: Geothermal heat flow in Antarctica: current and future directions
Source: Copernicus journal article supplement (doi:10.5194/tc-14-3843-2020), 2020-11-10
Supplement: Supplementary file 1 [file ANT_GHF_DB_V003.xlsx]

## Sheet: ANT_GHF_DB_V003
(1) Latitude	(2) Longitude	(3) Station ID	(4) top (m)	(5) bot (m)	(6) grad (°C/km)	(7) k(W/mK)	(8) GHF (mW/m²)	(9) Err (mW/m²)	(10) Elevation (m.a.s.l.)	(11) Reference	(12) DOI	(13) DataQuality	(14) Method	(15) Comment
-56.5667	34.1833	C11-44	0	11	300	0.77	229		-5372	Anderson1977	https://doi.org/10.1594/PANGAEA.796541	S3	Unconsolidated sediments
-56.3	51.9667	C11-45	0	11	19	0.72	14		-5386	Anderson1977	https://doi.org/10.1594/PANGAEA.796541	S3	Unconsolidated sediments
-52.7	54	C11-47	0	11	90	0.72	65		-4585	Anderson1977	https://doi.org/10.1594/PANGAEA.796541	S3	Unconsolidated sediments
-50.4667	59.5833	C11-48	0	7	360	0.75	271		-4839	Anderson1977	https://doi.org/10.1594/PANGAEA.796541	S3	Unconsolidated sediments
-50.3167	61.2	C11-49	0	11	120	0.68	81		-4640	Anderson1977	https://doi.org/10.1594/PANGAEA.796541	S3	Unconsolidated sediments
-61.4617	170.182	GEOSECS 7-1		2	87	0.68	59		-4000	Anderson1978	https://doi.org/10.1594/PANGAEA.796276	S1	Unconsolidated sediments
-61.0717	170.103	GEOSECS 7-2		2	140	0.68	95		-3764	Anderson1978	https://doi.org/10.1594/PANGAEA.796276	S1	Unconsolidated sediments
-62.4667	170.05	GEOSECS 7-3		2	116	0.75	87		-2198	Anderson1978	https://doi.org/10.1594/PANGAEA.796276	S1	Unconsolidated sediments
-62.9833	170	GEOSECS 7-4		2	142	0.75	106		-2364	Anderson1978	https://doi.org/10.1594/PANGAEA.796276	S1	Unconsolidated sediments
-64.1333	169.983	GEOSECS 7-6		2	154	0.75	116		-3091	Anderson1978	https://doi.org/10.1594/PANGAEA.796276	S1	Unconsolidated sediments
-64.6333	170	GEOSECS 7-7		2	150	0.75	113		-3182	Anderson1978	https://doi.org/10.1594/PANGAEA.796276	S1	Unconsolidated sediments
-69.0333	-172.967	GEOSECS 7-8		2	69	0.69	47		-4150	Anderson1978	https://doi.org/10.1594/PANGAEA.796276	S1	Unconsolidated sediments
-67.7333	-174	GEOSECS 7-9		2	104	0.69	69		-3810	Anderson1978	https://doi.org/10.1594/PANGAEA.796276	S1	Unconsolidated sediments
-61.9867	-174	GEOSECS 7-10		2	103	0.67	69		-3962	Anderson1978	https://doi.org/10.1594/PANGAEA.796276	S1	Unconsolidated sediments
-59	-175.583	GEOSECS 7-11		2	247	0.71	176		-5034	Anderson1978	https://doi.org/10.1594/PANGAEA.796276	S1	Unconsolidated sediments
-55.6	-175.82	GEOSECS 7-12		2	84	0.72	60		-5159	Anderson1978	https://doi.org/10.1594/PANGAEA.796276	S1	Unconsolidated sediments
-55.1417	-176.133	GEOSECS 7-13		2	96	0.72	69		-5295	Anderson1978	https://doi.org/10.1594/PANGAEA.796276	S1	Unconsolidated sediments
-54	-176.75	GEOSECS 7-14		2	103	0.72	74		-5401	Anderson1978	https://doi.org/10.1594/PANGAEA.796276	S1	Unconsolidated sediments
-53.1333	-177.592	GEOSECS 7-15		2	99	0.75	75		-5379	Anderson1978	https://doi.org/10.1594/PANGAEA.796276	S1	Unconsolidated sediments
-53.2167	-178.157	GEOSECS 7-16		2	89	0.75	67		-5275	Anderson1978	https://doi.org/10.1594/PANGAEA.796276	S1	Unconsolidated sediments
-57.9667	168.883	MONSOON 7-50		1	55	0.79	44		-5240	Anderson1978	https://doi.org/10.1594/PANGAEA.796276	S1	Unconsolidated sediments
-60.9667	170.283	MONSOON 7-51		2	131	0.68	89		-4755	Anderson1978	https://doi.org/10.1594/PANGAEA.796276	S1	Unconsolidated sediments
-63.0833	178.467	MONSOON 7-52		2	52	0.66	34		-3850	Anderson1978	https://doi.org/10.1594/PANGAEA.796276	S1	Unconsolidated sediments
-64.2167	-165.9	MONSOON 7-53		2	72	0.69	49		-2920	Anderson1978	https://doi.org/10.1594/PANGAEA.796276	S1	Unconsolidated sediments
-63.2833	-166.917	MONSOON 7-54		1	61	0.7	43		-2640	Anderson1978	https://doi.org/10.1594/PANGAEA.796276	S1	Unconsolidated sediments
-54.5167	-177.183	MONSOON 7-57		2	67	0.72	48		-5320	Anderson1978	https://doi.org/10.1594/PANGAEA.796276	S1	Unconsolidated sediments
-51.1	179.817	MONSOON 7-58		2	70	0.75	53		-4835	Anderson1978	https://doi.org/10.1594/PANGAEA.796276	S1	Unconsolidated sediments
-84.4368	-162.859	WGZ	0.2	1.4		1.77	88	7		Begeman2017	https://doi.org/10.1002/2017gl075579	S1	Unconsolidated sediments	3 km downstream of the Whillans ice stream Grounding Zone
-76.0667	164.883	ANT008St6	2	3.4	98	0.68	66.3	5.2	-912	Blackman1987	https://doi.org/10.1594/PANGAEA.802482	S2	Unconsolidated sediments
-74.4833	168.167	ANT009ST9	1	3.4	108	0.73	73.3	11.7	-909	Blackman1987	https://doi.org/10.1594/PANGAEA.802482	S2	Unconsolidated sediments
-77.85	166.675	DVDP-3/Ross Island	220	260	45	2.01	92		48	Bucher1980	https://doi.pangaea.de/10.1594/PANGAEA.806603	R2	Bedrock borehole
-77.85	166.675	DVDP-3/Ross Island	160	220	37	2.26	84		48	Bucher1980	https://doi.pangaea.de/10.1594/PANGAEA.806603	R2	Bedrock borehole
-77.85	166.675	DVDP-3/Ross Island	100	160	30	2.47	75		48	Bucher1980	https://doi.pangaea.de/10.1594/PANGAEA.806603	R2	Bedrock borehole
-77.38	161.81	DVDP-6/Lake Vida	60	190	33	2.64	88		349	Bucher1980	https://doi.pangaea.de/10.1594/PANGAEA.806603	R2	Bedrock borehole
-77.38	161.81	DVDP-6/Lake Vida	260	305	26	3.39	85		349	Bucher1980	https://doi.pangaea.de/10.1594/PANGAEA.806603	R2	Bedrock borehole
-77.38	161.81	DVDP-6/Lake Vida	190	305	26	3.39	85		349	Bucher1980	https://doi.pangaea.de/10.1594/PANGAEA.806603	R2	Bedrock borehole
-77.5783	163.512	DVDP-8 New Harbor	30	135	64	1.92	124			Bucher1980	https://doi.pangaea.de/10.1594/PANGAEA.806603	R2	Bedrock borehole
-77.5783	163.512	DVDP-10 New Harbor	60	160	61	1.92	117			Bucher1980	https://doi.pangaea.de/10.1594/PANGAEA.806603	R2	Bedrock borehole
-77.59	163.412	DVDP-11/Commonwe	100	310	48	1.92	92		80	Bucher1980	https://doi.pangaea.de/10.1594/PANGAEA.806603	R2	Bedrock borehole
-77.6333	162.853	DVDP-12/Lake Leon	165	185	29	3.47	100		75	Bucher1980	https://doi.pangaea.de/10.1594/PANGAEA.806603	R2	Bedrock borehole
-77.54	161.407	DVDP-14/North Fork	30	60	48	2.93	142		68	Bucher1980	https://doi.pangaea.de/10.1594/PANGAEA.806603	R2	Bedrock borehole
-77.4367	164.38	DVDP-15/McMurdo So	130	155	32	2.93	73		-122	Bucher1980	https://doi.pangaea.de/10.1594/PANGAEA.806603	R2	Bedrock borehole
-77.006	163.719	CRP-2/2A	10	624	24	2.1 ?	50			Bücker2000	https://epic.awi.de/id/eprint/27394/1/Bck2000a.pdf	R2	Bedrock borehole
-77.006	163.719	CRP-3		900	28.5	2.1	60			Bücker2001	https://epic.awi.de/id/eprint/27393/1/Bck2001a.pdf	R2	Bedrock borehole
-68.85	77.83	Rauer Islands					40			Carson2014	https://doi.org/10.1144/jgs2013-030		Radiogenic heat production
-68.68	78.25	Vestfold Hills					31			Carson2014	https://doi.org/10.1144/jgs2013-030		Radiogenic heat production
-79.4677	-112.086	WAIS Divide					240			Clow2012	http://adsabs.harvard.edu/abs/2012AGUFM.C31A0577C	I1	Ice borehole	AGU abstract, not published due to large uncertainty
-66.7667	112.8	Dome Summit South (DSS)	0	1200			75	0.6		Dahl-Jensen1999	https://doi.org/10.3189/172756499781821102	I3	Ice borehole
-77.6	-119.1	Thwaites Glacier					97			Damiani2014	https://doi.org/10.1016/j.epsl.2014.09.023		Gravity
-76.6	-117.7	Thwaites Glacier					97			Damiani2014	https://doi.org/10.1016/j.epsl.2014.09.023		Gravity
-75.68	160.803	Mt. Billing		102	12	2.1	25			Delisle1994	http://www.mna.unisi.it/Editoria/TAP/TA_pdfs/Volume_01/TA_01_527_Delisle.pdf	I1	Ice borehole	Ice sheet not frozen to bed.
-75.6583	161.213	Mt. Howard		83	24	2.1	50			Delisle1994	http://www.mna.unisi.it/Editoria/TAP/TA_pdfs/Volume_01/TA_01_527_Delisle.pdf	I1	Ice borehole	Shallow hole. Ice sheet not frozen to bed.
-75.7583	158.84	Ricker Hills		51	13	2.1	27			Delisle1994	http://www.mna.unisi.it/Editoria/TAP/TA_pdfs/Volume_01/TA_01_527_Delisle.pdf	I1	Ice borehole	Shallow hole. Ice sheet not frozen to bed.
-75.0208	165.919	Drygalsky02		3	94	1.3	125	6	-1020	DellaVedova1992	https://www.terrapub.co.jp/e-library/aes/pdf/RP0627.PDF	S1	Unconsolidated sediments			0.75
-75.06	165.71	Drygalsky02		3	95	1.3	121	3	-1032	DellaVedova1992	https://www.terrapub.co.jp/e-library/aes/pdf/RP0627.PDF	S1	Unconsolidated sediments		2	1.5
-75.13	165.29	Drygalsky03		2	57	0.9	51		-1060	DellaVedova1992	https://www.terrapub.co.jp/e-library/aes/pdf/RP0627.PDF	S1	Unconsolidated sediments		3	2.25
-76.12	165.12	Terror Rift04		4	77	1.3	100	9	-865	DellaVedova1992	https://www.terrapub.co.jp/e-library/aes/pdf/RP0627.PDF	S2	Unconsolidated sediments		4	3
-76.16	165.09	Terror Rift05		4	83	1.1	91	1	-870	DellaVedova1992	https://www.terrapub.co.jp/e-library/aes/pdf/RP0627.PDF	S2	Unconsolidated sediments
-76.16	165.07	Terror Rift06		4	109	0.9	98	3	-870	DellaVedova1992	https://www.terrapub.co.jp/e-library/aes/pdf/RP0627.PDF	S1	Unconsolidated sediments
-76.1	164.99	Terror Rift07		3	72	1.1	78		-885	DellaVedova1992	https://www.terrapub.co.jp/e-library/aes/pdf/RP0627.PDF	S1	Unconsolidated sediments
-76.11	164.99	Terror Rift08		3	99	1	103	5	-875	DellaVedova1992	https://www.terrapub.co.jp/e-library/aes/pdf/RP0627.PDF	S1	Unconsolidated sediments
-76.04	164.99	Terror Rift09		4	91	0.9	87	9	-875	DellaVedova1992	https://www.terrapub.co.jp/e-library/aes/pdf/RP0627.PDF	S2	Unconsolidated sediments
-76.04	165	Terror Rift10		4	88	1.1	100	5	-880	DellaVedova1992	https://www.terrapub.co.jp/e-library/aes/pdf/RP0627.PDF	S2	Unconsolidated sediments
-76.05	164.89	Terror Rift11		4	88	1.2	105	4	-885	DellaVedova1992	https://www.terrapub.co.jp/e-library/aes/pdf/RP0627.PDF	S2	Unconsolidated sediments
-76.05	164.92	Terror Rift12		4	123	1	118	23	-893	DellaVedova1992	https://www.terrapub.co.jp/e-library/aes/pdf/RP0627.PDF	S2	Unconsolidated sediments
-63.39	-68.45	BDIS2.1		5.25	110	0.99	122	16	-3559	Dougherty1986	https://doi.org/10.1594/PANGAEA.806816	S3	Unconsolidated sediments	Publication download via: https://www.google.com/url?sa=t&rct=j&q=&esrc=s&source=web&cd=&cad=rja&uact=8&ved=2ahUKEwih6-Da5uDqAhWQ_qQKHTMNAjMQFjAAegQIAxAB&url=https%3A%2F%2Fs3.amazonaws.com%2FAntarctica%2FAJUS%2FAJUSvXXIn5%2FAJUSvXXIn5p151.pdf&usg=AOvVaw3-id6Wb6hxbDEjDy-RbFxB
-63.38	-68.43	BDIS2.2		5.25	105	1.09	129	34	-3560	Dougherty1986	https://doi.org/10.1594/PANGAEA.806816	S3	Unconsolidated sediments	GHF values from Table "Heat-flow measurement data" column 'Corr. Q mW/m²'. Corrections of raw temperature gradients include adjustment for sedimentation and seasonal varations in bottom-water temperature (station 7A and 7B only). Elevation extracted from BEDMACHINE. Up to 7 sensors on probe with 0.75 m spacing. Bottom (m) calculated from number of sensors given in table and spacing.
-63.37	-68.41	BDIS2.3		5.25	104	1.07	124	23	-3558	Dougherty1986	https://doi.org/10.1594/PANGAEA.806816	S3	Unconsolidated sediments	GHF values from Table "Heat-flow measurement data" column 'Corr. Q mW/m²'. Corrections of raw temperature gradients include adjustment for sedimentation and seasonal varations in bottom-water temperature (station 7A and 7B only). Elevation extracted from BEDMACHINE. Up to 7 sensors on probe with 0.75 m spacing. Bottom (m) calculated from number of sensors given in table and spacing.
-63.36	-68.41	BDIS2.4		5.25	107	1.03	123	11	-3561	Dougherty1986	https://doi.org/10.1594/PANGAEA.806816	S3	Unconsolidated sediments	GHF values from Table "Heat-flow measurement data" column 'Corr. Q mW/m²'. Corrections of raw temperature gradients include adjustment for sedimentation and seasonal varations in bottom-water temperature (station 7A and 7B only). Elevation extracted from BEDMACHINE. Up to 7 sensors on probe with 0.75 m spacing. Bottom (m) calculated from number of sensors given in table and spacing.
-63.36	-68.42	BDIS2.5		5.25	107	1.1	118	7	-3568	Dougherty1986	https://doi.org/10.1594/PANGAEA.806816	S3	Unconsolidated sediments	GHF values from Table "Heat-flow measurement data" column 'Corr. Q mW/m²'. Corrections of raw temperature gradients include adjustment for sedimentation and seasonal varations in bottom-water temperature (station 7A and 7B only). Elevation extracted from BEDMACHINE. Up to 7 sensors on probe with 0.75 m spacing. Bottom (m) calculated from number of sensors given in table and spacing.
-63.35	-68.42	BDIS2.6		5.25	106	1	119	8	-3577	Dougherty1986	https://doi.org/10.1594/PANGAEA.806816	S3	Unconsolidated sediments	GHF values from Table "Heat-flow measurement data" column 'Corr. Q mW/m²'. Corrections of raw temperature gradients include adjustment for sedimentation and seasonal varations in bottom-water temperature (station 7A and 7B only). Elevation extracted from BEDMACHINE. Up to 7 sensors on probe with 0.75 m spacing. Bottom (m) calculated from number of sensors given in table and spacing.
-63.67	-66.61	BDIS3.1		5.25	125	1.01	154	25	-3331	Dougherty1986	https://doi.org/10.1594/PANGAEA.806816	S3	Unconsolidated sediments	GHF values from Table "Heat-flow measurement data" column 'Corr. Q mW/m²'. Corrections of raw temperature gradients include adjustment for sedimentation and seasonal varations in bottom-water temperature (station 7A and 7B only). Elevation extracted from BEDMACHINE. Up to 7 sensors on probe with 0.75 m spacing. Bottom (m) calculated from number of sensors given in table and spacing.
-63.67	-66.62	BDIS3.2		5.25	119	0.97	141	11	-3337	Dougherty1986	https://doi.org/10.1594/PANGAEA.806816	S3	Unconsolidated sediments	GHF values from Table "Heat-flow measurement data" column 'Corr. Q mW/m²'. Corrections of raw temperature gradients include adjustment for sedimentation and seasonal varations in bottom-water temperature (station 7A and 7B only). Elevation extracted from BEDMACHINE. Up to 7 sensors on probe with 0.75 m spacing. Bottom (m) calculated from number of sensors given in table and spacing.
-63.67	-66.6	BDIS3.3		5.25	116	1.03	147	22	-3329	Dougherty1986	https://doi.org/10.1594/PANGAEA.806816	S3	Unconsolidated sediments	GHF values from Table "Heat-flow measurement data" column 'Corr. Q mW/m²'. Corrections of raw temperature gradients include adjustment for sedimentation and seasonal varations in bottom-water temperature (station 7A and 7B only). Elevation extracted from BEDMACHINE. Up to 7 sensors on probe with 0.75 m spacing. Bottom (m) calculated from number of sensors given in table and spacing.
-63.69	-66.61	BDIS3.4		5.25	130	1.05	167	12	-3340	Dougherty1986	https://doi.org/10.1594/PANGAEA.806816	S3	Unconsolidated sediments	GHF values from Table "Heat-flow measurement data" column 'Corr. Q mW/m²'. Corrections of raw temperature gradients include adjustment for sedimentation and seasonal varations in bottom-water temperature (station 7A and 7B only). Elevation extracted from BEDMACHINE. Up to 7 sensors on probe with 0.75 m spacing. Bottom (m) calculated from number of sensors given in table and spacing.
-63.69	-66.54	BDIS3.6		5.25	135	0.86	141	21	-3309	Dougherty1986	https://doi.org/10.1594/PANGAEA.806816	S3	Unconsolidated sediments	GHF values from Table "Heat-flow measurement data" column 'Corr. Q mW/m²'. Corrections of raw temperature gradients include adjustment for sedimentation and seasonal varations in bottom-water temperature (station 7A and 7B only). Elevation extracted from BEDMACHINE. Up to 7 sensors on probe with 0.75 m spacing. Bottom (m) calculated from number of sensors given in table and spacing.
-63.69	-66.53	BDIS3.7		5.25	126	0.93	143	14	-3308	Dougherty1986	https://doi.org/10.1594/PANGAEA.806816	S3	Unconsolidated sediments	GHF values from Table "Heat-flow measurement data" column 'Corr. Q mW/m²'. Corrections of raw temperature gradients include adjustment for sedimentation and seasonal varations in bottom-water temperature (station 7A and 7B only). Elevation extracted from BEDMACHINE. Up to 7 sensors on probe with 0.75 m spacing. Bottom (m) calculated from number of sensors given in table and spacing.
-63.75	-66.41	BDIS5.1		3	150	0.97	178	16	-3294	Dougherty1986	https://doi.org/10.1594/PANGAEA.806816	S3	Unconsolidated sediments	GHF values from Table "Heat-flow measurement data" column 'Corr. Q mW/m²'. Corrections of raw temperature gradients include adjustment for sedimentation and seasonal varations in bottom-water temperature (station 7A and 7B only). Elevation extracted from BEDMACHINE. Up to 7 sensors on probe with 0.75 m spacing. Bottom (m) calculated from number of sensors given in table and spacing.
-63.75	-66.41	BDIS5.2		2.25	147	0.97	174	17	-3294	Dougherty1986	https://doi.org/10.1594/PANGAEA.806816	S3	Unconsolidated sediments	GHF values from Table "Heat-flow measurement data" column 'Corr. Q mW/m²'. Corrections of raw temperature gradients include adjustment for sedimentation and seasonal varations in bottom-water temperature (station 7A and 7B only). Elevation extracted from BEDMACHINE. Up to 7 sensors on probe with 0.75 m spacing. Bottom (m) calculated from number of sensors given in table and spacing.
-63.82	-66.35	BDIS6.1		1.5	64	0.97	77	13	-3075	Dougherty1986	https://doi.org/10.1594/PANGAEA.806816	S1	Unconsolidated sediments	GHF values from Table "Heat-flow measurement data" column 'Corr. Q mW/m²'. Corrections of raw temperature gradients include adjustment for sedimentation and seasonal varations in bottom-water temperature (station 7A and 7B only). Elevation extracted from BEDMACHINE. Up to 7 sensors on probe with 0.75 m spacing. Bottom (m) calculated from number of sensors given in table and spacing.
-64.38	-66.77	BDIS7A.3		2.25	96	1.02	122	88	-480	Dougherty1986	https://doi.org/10.1594/PANGAEA.806816	S1	Unconsolidated sediments	GHF values from Table "Heat-flow measurement data" column 'Corr. Q mW/m²'. Corrections of raw temperature gradients include adjustment for sedimentation and seasonal varations in bottom-water temperature (station 7A and 7B only). Elevation extracted from BEDMACHINE. Up to 7 sensors on probe with 0.75 m spacing. Bottom (m) calculated from number of sensors given in table and spacing.
-64.38	-66.76	BDIS7A.4		2.25	65	1.08	89	20	-490	Dougherty1986	https://doi.org/10.1594/PANGAEA.806816	S1	Unconsolidated sediments	GHF values from Table "Heat-flow measurement data" column 'Corr. Q mW/m²'. Corrections of raw temperature gradients include adjustment for sedimentation and seasonal varations in bottom-water temperature (station 7A and 7B only). Elevation extracted from BEDMACHINE. Up to 7 sensors on probe with 0.75 m spacing. Bottom (m) calculated from number of sensors given in table and spacing.
-64.38	-66.76	BDIS7A.5		3	38	1.08	44	10	-490	Dougherty1986	https://doi.org/10.1594/PANGAEA.806816	S1	Unconsolidated sediments	GHF values from Table "Heat-flow measurement data" column 'Corr. Q mW/m²'. Corrections of raw temperature gradients include adjustment for sedimentation and seasonal varations in bottom-water temperature (station 7A and 7B only). Elevation extracted from BEDMACHINE. Up to 7 sensors on probe with 0.75 m spacing. Bottom (m) calculated from number of sensors given in table and spacing.
-64.38	-66.76	BDIS7A.6		2.25	28	1.04	31	67	-490	Dougherty1986	https://doi.org/10.1594/PANGAEA.806816	S1	Unconsolidated sediments	GHF values from Table "Heat-flow measurement data" column 'Corr. Q mW/m²'. Corrections of raw temperature gradients include adjustment for sedimentation and seasonal varations in bottom-water temperature (station 7A and 7B only). Elevation extracted from BEDMACHINE. Up to 7 sensors on probe with 0.75 m spacing. Bottom (m) calculated from number of sensors given in table and spacing.
-64.38	-66.75	BDIS7A.7		1.5	40	1.1	63	45	-494	Dougherty1986	https://doi.org/10.1594/PANGAEA.806816	S1	Unconsolidated sediments	GHF values from Table "Heat-flow measurement data" column 'Corr. Q mW/m²'. Corrections of raw temperature gradients include adjustment for sedimentation and seasonal varations in bottom-water temperature (station 7A and 7B only). Elevation extracted from BEDMACHINE. Up to 7 sensors on probe with 0.75 m spacing. Bottom (m) calculated from number of sensors given in table and spacing.
-64.39	-66.73	BDIS7A.8		1.5	56	0.95	103	34	-516	Dougherty1986	https://doi.org/10.1594/PANGAEA.806816	S1	Unconsolidated sediments	GHF values from Table "Heat-flow measurement data" column 'Corr. Q mW/m²'. Corrections of raw temperature gradients include adjustment for sedimentation and seasonal varations in bottom-water temperature (station 7A and 7B only). Elevation extracted from BEDMACHINE. Up to 7 sensors on probe with 0.75 m spacing. Bottom (m) calculated from number of sensors given in table and spacing.
-64.37	-66.61	BDIS7B.10		3	97	0.99	109	24	-534	Dougherty1986	https://doi.org/10.1594/PANGAEA.806816	S1	Unconsolidated sediments	GHF values from Table "Heat-flow measurement data" column 'Corr. Q mW/m²'. Corrections of raw temperature gradients include adjustment for sedimentation and seasonal varations in bottom-water temperature (station 7A and 7B only). Elevation extracted from BEDMACHINE. Up to 7 sensors on probe with 0.75 m spacing. Bottom (m) calculated from number of sensors given in table and spacing.
-64.37	-66.61	BDIS7B.11		3	81	1.03	104	31	-534	Dougherty1986	https://doi.org/10.1594/PANGAEA.806816	S1	Unconsolidated sediments	GHF values from Table "Heat-flow measurement data" column 'Corr. Q mW/m²'. Corrections of raw temperature gradients include adjustment for sedimentation and seasonal varations in bottom-water temperature (station 7A and 7B only). Elevation extracted from BEDMACHINE. Up to 7 sensors on probe with 0.75 m spacing. Bottom (m) calculated from number of sensors given in table and spacing.
-64.37	-66.6	BDIS7B.12		2.25	55	1.02	89	58	-534	Dougherty1986	https://doi.org/10.1594/PANGAEA.806816	S1	Unconsolidated sediments	GHF values from Table "Heat-flow measurement data" column 'Corr. Q mW/m²'. Corrections of raw temperature gradients include adjustment for sedimentation and seasonal varations in bottom-water temperature (station 7A and 7B only). Elevation extracted from BEDMACHINE. Up to 7 sensors on probe with 0.75 m spacing. Bottom (m) calculated from number of sensors given in table and spacing.
-64.37	-66.64	BDIS7B.13		3	77	0.92	60	26	-535	Dougherty1986	https://doi.org/10.1594/PANGAEA.806816	S1	Unconsolidated sediments	GHF values from Table "Heat-flow measurement data" column 'Corr. Q mW/m²'. Corrections of raw temperature gradients include adjustment for sedimentation and seasonal varations in bottom-water temperature (station 7A and 7B only). Elevation extracted from BEDMACHINE. Up to 7 sensors on probe with 0.75 m spacing. Bottom (m) calculated from number of sensors given in table and spacing.
-64.37	-66.64	BDIS7B.14		3	85	0.98	75	53	-534	Dougherty1986	https://doi.org/10.1594/PANGAEA.806816	S1	Unconsolidated sediments	GHF values from Table "Heat-flow measurement data" column 'Corr. Q mW/m²'. Corrections of raw temperature gradients include adjustment for sedimentation and seasonal varations in bottom-water temperature (station 7A and 7B only). Elevation extracted from BEDMACHINE. Up to 7 sensors on probe with 0.75 m spacing. Bottom (m) calculated from number of sensors given in table and spacing.
-64.37	-66.65	BDIS7B.15		3	61	0.9	90	36	-535	Dougherty1986	https://doi.org/10.1594/PANGAEA.806816	S1	Unconsolidated sediments	GHF values from Table "Heat-flow measurement data" column 'Corr. Q mW/m²'. Corrections of raw temperature gradients include adjustment for sedimentation and seasonal varations in bottom-water temperature (station 7A and 7B only). Elevation extracted from BEDMACHINE. Up to 7 sensors on probe with 0.75 m spacing. Bottom (m) calculated from number of sensors given in table and spacing.
-64.37	-66.66	BDIS7B.16		2.25	66	0.95	59	27	-535	Dougherty1986	https://doi.org/10.1594/PANGAEA.806816	S1	Unconsolidated sediments	GHF values from Table "Heat-flow measurement data" column 'Corr. Q mW/m²'. Corrections of raw temperature gradients include adjustment for sedimentation and seasonal varations in bottom-water temperature (station 7A and 7B only). Elevation extracted from BEDMACHINE. Up to 7 sensors on probe with 0.75 m spacing. Bottom (m) calculated from number of sensors given in table and spacing.
-64.37	-66.67	BDIS7B.17		1.5	45	0.95	88	31	-535	Dougherty1986	https://doi.org/10.1594/PANGAEA.806816	S1	Unconsolidated sediments	GHF values from Table "Heat-flow measurement data" column 'Corr. Q mW/m²'. Corrections of raw temperature gradients include adjustment for sedimentation and seasonal varations in bottom-water temperature (station 7A and 7B only). Elevation extracted from BEDMACHINE. Up to 7 sensors on probe with 0.75 m spacing. Bottom (m) calculated from number of sensors given in table and spacing.
-64.37	-66.67	BDIS7B.19		1.5	65	0.93	54	20	-535	Dougherty1986	https://doi.org/10.1594/PANGAEA.806816	S1	Unconsolidated sediments	GHF values from Table "Heat-flow measurement data" column 'Corr. Q mW/m²'. Corrections of raw temperature gradients include adjustment for sedimentation and seasonal varations in bottom-water temperature (station 7A and 7B only). Elevation extracted from BEDMACHINE. Up to 7 sensors on probe with 0.75 m spacing. Bottom (m) calculated from number of sensors given in table and spacing.
-64.37	-66.62	BDIS7B.9		1.5	103	0.99	86	20	-534	Dougherty1986	https://doi.org/10.1594/PANGAEA.806816	S1	Unconsolidated sediments	GHF values from Table "Heat-flow measurement data" column 'Corr. Q mW/m²'. Corrections of raw temperature gradients include adjustment for sedimentation and seasonal varations in bottom-water temperature (station 7A and 7B only). Elevation extracted from BEDMACHINE. Up to 7 sensors on probe with 0.75 m spacing. Bottom (m) calculated from number of sensors given in table and spacing.
-74.5087	-134.123	HF1	0	2.84	38	1	38		-893	Dziadek2017	https://doi.org/10.1002/2016GC006755	S1	Unconsolidated sediments
-74.8332	-103.499	HF2	0	2.84	18.2	0.93956	17.1		-1021	Dziadek2017	https://doi.org/10.1002/2016GC006755	S1	Unconsolidated sediments
-74.7413	-104.392	HF3	0	2.84	11.7	0.940171	11		-1104	Dziadek2017	https://doi.org/10.1002/2016GC006755	S1	Unconsolidated sediments
-74.7473	-105.201	HF4	0	2.84	26.5	0.939623	24.9		-1302	Dziadek2017	https://doi.org/10.1002/2016GC006755	S1	Unconsolidated sediments
-74.6696	-106.606	HF5	0	2.84	31.6	0.939873	29.7		-1184	Dziadek2017	https://doi.org/10.1002/2016GC006755	S1	Unconsolidated sediments
-74.6017	-106.611	HF6	0	2.84	54.9	0.939891	51.6		-1353	Dziadek2017	https://doi.org/10.1002/2016GC006755	S1	Unconsolidated sediments
-74.3333	-106	HF7	0	2.84	54.6	0.941392	51.4		-1386	Dziadek2017	https://doi.org/10.1002/2016GC006755	S1	Unconsolidated sediments
-74.2088	-105.55	HF8	0	2.84	44.4	0.941441	41.8		-1644	Dziadek2017	https://doi.org/10.1002/2016GC006755	S1	Unconsolidated sediments
-74.1388	-106.73	HF9	0	2.84	56.8	0.940141	53.4		-1468	Dziadek2017	https://doi.org/10.1002/2016GC006755	S1	Unconsolidated sediments
-74.0015	-105.692	HF10	0	2.84	30.5	0.940984	28.7		-1037	Dziadek2017	https://doi.org/10.1002/2016GC006755	S1	Unconsolidated sediments
-74.0417	-106.185	HF12	0	2.84	33	0.939394	31		-1111	Dziadek2017	https://doi.org/10.1002/2016GC006755	S1	Unconsolidated sediments
-73.5238	-106.2	HF13	0	2.84	46.2	0.939394	43.4		-806	Dziadek2017	https://doi.org/10.1002/2016GC006755	S1	Unconsolidated sediments
-73.5286	-106.198	HF14	0	2.84	24.1	0.941909	22.7		-813	Dziadek2017	https://doi.org/10.1002/2016GC006755	S1	Unconsolidated sediments
-73.5187	-106.201	HF15	0	2.84	25.7	0.941634	24.2		-814	Dziadek2017	https://doi.org/10.1002/2016GC006755	S1	Unconsolidated sediments
-73.5209	-106.201	HF16	0	2.84	10.7	0.943925	10.1		-795	Dziadek2017	https://doi.org/10.1002/2016GC006755	S1	Unconsolidated sediments
-73.5181	-106.205	HF17	0	2.84	58.3	0.778731	45.4		-795	Dziadek2017	https://doi.org/10.1002/2016GC006755	S1	Unconsolidated sediments
-71.8796	-103.387	HF18	0	2.84	30.3	0.937294	28.4		-752	Dziadek2017	https://doi.org/10.1002/2016GC006755	S1	Unconsolidated sediments
-71.7448	-103.328	HF19	0	2.84	60.1	0.9401	56.5		-768	Dziadek2017	https://doi.org/10.1002/2016GC006755	S1	Unconsolidated sediments
-71.4534	-103.001	HF20	0	2.84	27.8	0.938849	26.1		-626	Dziadek2017	https://doi.org/10.1002/2016GC006755	S1	Unconsolidated sediments
-71.0663	-102.367	HF21	0	2.84	32.4	0.938272	30.4		-1447	Dziadek2017	https://doi.org/10.1002/2016GC006755	S1	Unconsolidated sediments
-71.8963	-105.619	HF22	0	2.84	59.3	0.940978	55.8		-496	Dziadek2017	https://doi.org/10.1002/2016GC006755	S1	Unconsolidated sediments
-74.5342	-102.612	HF23	0	2.84	5.8	0.948276	5.5		-611	Dziadek2017	https://doi.org/10.1002/2016GC006755	S1	Unconsolidated sediments
-74.6113	-105.852	HF24	0	2.84	15.6	0.935897	14.6		-626	Dziadek2017	https://doi.org/10.1002/2016GC006755	S1	Unconsolidated sediments
-72.8327	-106.502	HF25	0	2.84	34	0.938235	31.9		-577	Dziadek2017	https://doi.org/10.1002/2016GC006755	S1	Unconsolidated sediments
-70.3643	-113.957	HF26	0	2.84	54.4	1	54.4		-3496	Dziadek2017	https://doi.org/10.1002/2016GC006755	S2	Unconsolidated sediments	R2 stable ambient water temperatures
-74.931	-101.556	HF1701	0	7.02	26.2	1.17	30.8	1.5	-883	Dziadek2019	https://doi.pangaea.de/10.1594/PANGAEA.897868	S1	Unconsolidated sediments
-74.868	-100.711	HF1702	0	9.7	30.2	1.17	35.4	2.8	-700	Dziadek2019	https://doi.pangaea.de/10.1594/PANGAEA.897868	S2	Unconsolidated sediments
-74.986	-101.869	HF1703	0	4.8	41.3	1.17	48.5	14.2	-980	Dziadek2019	https://doi.pangaea.de/10.1594/PANGAEA.897868	S1	Unconsolidated sediments
-75.031	-101.939	HF1704	0.6	4.15	44.6	1.17	52.4	8.2	-950	Dziadek2019	https://doi.pangaea.de/10.1594/PANGAEA.897868	S2	Unconsolidated sediments
-74.942	-102.295	HF1705	0.6	4.15	51.9	1.17	60.9	8.4	-936	Dziadek2019	https://doi.pangaea.de/10.1594/PANGAEA.897868	S1	Unconsolidated sediments
-74.684	-101.622	HF1706	1.72	3.5	94.9	1.17	111.4		-345	Dziadek2019	https://doi.pangaea.de/10.1594/PANGAEA.897868	S1	Unconsolidated sediments
-74.838	-101.044	HF1708	1.02	8.62	35.6	1.17	41.7		-530	Dziadek2019	https://doi.pangaea.de/10.1594/PANGAEA.897868	S2	Unconsolidated sediments
-74.549	-102.586	HF1709	1	4	25.2	1.17	29.5		-600	Dziadek2019	https://doi.pangaea.de/10.1594/PANGAEA.897868	S1	Unconsolidated sediments
-74.803	-102.344	HF1710	0.25	3.75	55	1.17	64.5	4.3	-1000	Dziadek2019	https://doi.pangaea.de/10.1594/PANGAEA.897868	S2	Unconsolidated sediments
-74.359	-104.747	HF1711	2.55	6.34	55.8	1.17	65.4	4.4	-1384	Dziadek2019	https://doi.pangaea.de/10.1594/PANGAEA.897868	S3	Unconsolidated sediments
-74.355	-104.757	HF1712	2.75	6.54	51	1.17	59.8	3.2	-1387	Dziadek2019	https://doi.pangaea.de/10.1594/PANGAEA.897868	S3	Unconsolidated sediments
-72.891	-104.099	HF1714	0.7	1.4	92.1	1.17	108.1		-490	Dziadek2019	https://doi.pangaea.de/10.1594/PANGAEA.897868	S1	Unconsolidated sediments
-74.417	-103.005	HF1716	3.05	6.84	97.6	1.17	114.6		-740	Dziadek2019	https://doi.pangaea.de/10.1594/PANGAEA.897868	S1	Unconsolidated sediments
-74.416	-103.001	HF1717	1.91	6.84	54	1.17	63.3	5.5	-740	Dziadek2019	https://doi.pangaea.de/10.1594/PANGAEA.897868	S3	Unconsolidated sediments
-74.415	-102.998	HF1718	1.91	6.84	57.5	1.17	67.5	5.7	-740	Dziadek2019	https://doi.pangaea.de/10.1594/PANGAEA.897868	S3	Unconsolidated sediments
-74.414	-102.995	HF1719	1.91	6.84	57.4	1.17	67.4	4.7	-737	Dziadek2019	https://doi.pangaea.de/10.1594/PANGAEA.897868	S3	Unconsolidated sediments
-74.413	-102.992	HF1720	1.91	6.84	59.4	1.17	69.7	1.1	-740	Dziadek2019	https://doi.pangaea.de/10.1594/PANGAEA.897868	S3	Unconsolidated sediments
-74.412	-102.988	HF1721	1.91	6.84	57.7	1.17	67.7	4.7	-735	Dziadek2019	https://doi.pangaea.de/10.1594/PANGAEA.897868	S3	Unconsolidated sediments
-74.416	-102.987	HF1722	1.91	6.84	65.4	1.17	76.7	0.8	-735	Dziadek2019	https://doi.pangaea.de/10.1594/PANGAEA.897868	S3	Unconsolidated sediments
-74.33	-104.822	HF1723	1.91	6.84	62.1	1.17	72.9	0.3	-1400	Dziadek2019	https://doi.pangaea.de/10.1594/PANGAEA.897868	S3	Unconsolidated sediments
-74.331	-104.82	HF1724	1.91	6.84	57.5	1.17	67.5	1.7	-1395	Dziadek2019	https://doi.pangaea.de/10.1594/PANGAEA.897868	S3	Unconsolidated sediments
-74.34	-104.799	HF1725	1.91	6.84	49.4	1.17	58	10.2	-1388	Dziadek2019	https://doi.pangaea.de/10.1594/PANGAEA.897868	S3	Unconsolidated sediments
-74.349	-104.721	HF1726	1.91	6.84	51.4	1.17	60.3	5.2	-1405	Dziadek2019	https://doi.pangaea.de/10.1594/PANGAEA.897868	S3	Unconsolidated sediments
-74.355	-104.76	HF1727	1.91	6.84	54.1	1.17	63.5	2.3	-1385	Dziadek2019	https://doi.pangaea.de/10.1594/PANGAEA.897868	S3	Unconsolidated sediments
-74.349	-104.737	HF1728	1.91	6.84	51.2	1.17	60.1	2.9	-1453	Dziadek2019	https://doi.pangaea.de/10.1594/PANGAEA.897868	S3	Unconsolidated sediments
-73.297	-112.33	HF1729	0.76	4.5	8.6	1.17	10.1		-483	Dziadek2019	https://doi.pangaea.de/10.1594/PANGAEA.897868	S1	Unconsolidated sediments
-81.658	-148.809	Siple Dome		1004.6			69	1		Engelhardt2004	https://doi.org/10.3189/172756504781830105	I3	Ice borehole
-84.24	-153.69	Lake Whillans		0.78		1.36	285	80		Fisher2015	https://doi.org/10.1126/sciadv.1500093	S1	Unconsolidated sediments
-84.24	-153.69	Lake Whillans	0	770	50	2.1	105	13		Fisher2015	https://doi.org/10.1126/sciadv.1500093	I1	Ice borehole	Ice sheet not frozen to bed.
-79.4677	-112.086	WAIS Divide		3405	34.8		180	40		Fisher2015	https://doi.org/10.1126/sciadv.1500093	I1	Ice borehole	Not thermally equilibrated. Estimates from Fudge et al. (2013), Nature. Fudge et al (2013) give the drill date as December 2011, and the borehole temperature gradient as of December 2011. Fisher states a GHF range of 140 to 220 mW/m²
-79.364	-168.625	Ross Ice Shelf J-9 Hole	0.1	2.1	67	0.816	54		-600	Foster1978	https://s3.amazonaws.com/Antarctica/AJUS/AJUSvXIIIn4/AJUSvXIIIn4p81.pdfxI1hWzvh2GiwYOs	S1	Unconsolidated sediments
-82.375	-161.706	Roosevelt Island Climate Evolution (RICE) ice core site		746			84	13		Fudge2019	https://agupubs.onlinelibrary.wiley.com/doi/full/10.1029/2019GL084332	I2	Ice borehole	Measured using bedrock temperature probe
		Engelhardt Ridge					85	11		Fudge2019	https://agupubs.onlinelibrary.wiley.com/doi/full/10.1029/2019GL084332		Glaciological model	Inferred using Siple Dome ice borehole
		Shabtaie Ridge					71	10		Fudge2019	https://agupubs.onlinelibrary.wiley.com/doi/full/10.1029/2019GL084332		Glaciological model	Inferred using Siple Dome ice borehole
-51.083	129.967	C8-58	0	17	37.5	0.88	33		-3442	Geli2008	https://doi.org/10.1029/2007JB005001	S3	Unconsolidated sediments	top and bottom from Fig. 5c
-56.217	134.017	V33-3	0	9	20.6349	0.63	13		-4130	Geli2008	https://doi.org/10.1029/2007JB005001	S1	Unconsolidated sediments
-56.1	131.917	V33-4	0	9	38.0952	0.63	24		-4402	Geli2008	https://doi.org/10.1029/2007JB005001	S1	Unconsolidated sediments
-54.483	119.933	V33-6	2.2	8.8	14.0625	0.64	9		-4029	Geli2008	https://doi.org/10.1029/2007JB005001	S1	Unconsolidated sediments
-54.467	122.9	V33-7	2.2	8.8	55.5556	0.63	35		-4514	Geli2008	https://doi.org/10.1029/2007JB005001	S3	Unconsolidated sediments
-54.533	125.333	V33-8	0	6.5	44.1176	0.68	30		-4679	Geli2008	https://doi.org/10.1029/2007JB005001	S1	Unconsolidated sediments
-68.6447	-107.525	U1532A	34	150	54	1.8	97.2			Gohl2019	http://publications.iodp.org/preliminary_report/379/379PR.PDF	R2	Bedrock borehole
-80.0167	-119.517	Byrd Station	50	2164	32.5		75			Gow1968	https://doi.org/10.1126/science.161.3845.1011	I1	Ice borehole	Ice sheet not frozen to the bed - liquid water encountered at the interface.
-77.3169	39.7033	Dome Fuji	0	3090			59			Hondoh2002	https://doi.org/10.3189/172756402781817013	I3	Ice borehole
-51.0667	60.3	CO8-42	0	8	75	0.65	49	6	-4720	Langseth1967	https://doi.org/10.1594/PANGAEA.805041	S3	Unconsolidated sediments
-53.0333	62.55	CO8-43	2	7	91	0.66	60	7	-4430	Langseth1967	https://doi.org/10.1594/PANGAEA.805041	S3	Unconsolidated sediments
-55.05	71.7833	CO8-45	0	8	93	0.69	64	26	-3508	Langseth1967	https://doi.org/10.1594/PANGAEA.805041	S1	Unconsolidated sediments	no linear gradient
-53.2667	76.9167	CO8-46	1	10	80	0.69	55	9	-1098	Langseth1967	https://doi.org/10.1594/PANGAEA.805041	S3	Unconsolidated sediments	conductivity assumed near station
-51.005	-46.9717	DSDP511	52	113	74	0.84	62		-2500	Langseth1983	http://deepseadrilling.org/71/volume/dsdp71pt1_09.pdf	S2	Unconsolidated sediments	temperature equilibration discussed
-57.1833	-29.1083	VUL5-3		4	190	0.71	134		-3357	Lawver1982	https://doi.org/10.1594/PANGAEA.809794	S2	Unconsolidated sediments
-57.1883	-29.105	VUL5-4		3	200	0.71	143		-3353	Lawver1982	https://doi.org/10.1594/PANGAEA.809794	S2	Unconsolidated sediments
-57.1833	-29.1033	VUL5-5		3	200	0.71	145		-3353	Lawver1982	https://doi.org/10.1594/PANGAEA.809794	S2	Unconsolidated sediments
-57.2117	-29.2033	VUL5-7		4	30	0.71	17		-3361	Lawver1982	https://doi.org/10.1594/PANGAEA.809794	S2	Unconsolidated sediments
-57.2167	-29.2033	VUL5-8		4	30	0.71	18		-3361	Lawver1982	https://doi.org/10.1594/PANGAEA.809794	S2	Unconsolidated sediments
-57.225	-29.225	VUL5-9		4	30	0.71	23		-3363	Lawver1982	https://doi.org/10.1594/PANGAEA.809794	S2	Unconsolidated sediments
-57.2167	-28.4667	VUL5-11		2	190	0.71	133		-3330	Lawver1982	https://doi.org/10.1594/PANGAEA.809794	S1	Unconsolidated sediments
-57.2483	-28.47	VUL5-12		2	140	0.71	99		-3334	Lawver1982	https://doi.org/10.1594/PANGAEA.809794	S1	Unconsolidated sediments
-57.245	-28.485	VUL5-13		2	130	0.71	94		-3334	Lawver1982	https://doi.org/10.1594/PANGAEA.809794	S1	Unconsolidated sediments
-56.9183	-28.44	VUL5-15		1	200	0.71	139		-3277	Lawver1982	https://doi.org/10.1594/PANGAEA.809794	S1	Unconsolidated sediments
-56.9167	-28.4	VUL5-16		1	190	0.71	134		-3290	Lawver1982	https://doi.org/10.1594/PANGAEA.809794	S1	Unconsolidated sediments
-56.9167	-28.515	VUL5-17		1	140	0.71	102		-3340	Lawver1982	https://doi.org/10.1594/PANGAEA.809794	S1	Unconsolidated sediments
-61.8	-39.955	2.1	7	7			81		-3441	Lawver1991	https://doi.org/10.1594/PANGAEA.805004	S3	Unconsolidated sediments
-61.7883	-40.3117	2.1	6	6			69		-3485	Lawver1991	https://doi.org/10.1594/PANGAEA.805004	S3	Unconsolidated sediments
-61.7917	-40.315	2.11	6	7			77		-3486	Lawver1991	https://doi.org/10.1594/PANGAEA.805004	S3	Unconsolidated sediments
-61.7917	-39.995	2.2	7	7			79		-3452	Lawver1991	https://doi.org/10.1594/PANGAEA.805004	S3	Unconsolidated sediments
-61.785	-40.0367	2.3	7	7			78		-3468	Lawver1991	https://doi.org/10.1594/PANGAEA.805004	S3	Unconsolidated sediments
-61.7883	-40.08	2.4	7	7			75		-3472	Lawver1991	https://doi.org/10.1594/PANGAEA.805004	S3	Unconsolidated sediments
-61.7883	-40.1217	2.5	6	7			78		-3479	Lawver1991	https://doi.org/10.1594/PANGAEA.805004	S3	Unconsolidated sediments
-61.7917	-40.155	2.6	6	7			76		-3463	Lawver1991	https://doi.org/10.1594/PANGAEA.805004	S3	Unconsolidated sediments
-61.7933	-40.1833	2.7	7	7			78		-3487	Lawver1991	https://doi.org/10.1594/PANGAEA.805004	S3	Unconsolidated sediments
-61.7933	-40.2117	2.8	7	7			75		-3477	Lawver1991	https://doi.org/10.1594/PANGAEA.805004	S3	Unconsolidated sediments
-61.7917	-40.2383	2.9	6	7			76		-3466	Lawver1991	https://doi.org/10.1594/PANGAEA.805004	S3	Unconsolidated sediments
-61.8267	-39.7417	3.1	6	7			83		-3397	Lawver1991	https://doi.org/10.1594/PANGAEA.805004	S3	Unconsolidated sediments
-61.8467	-39.3267	3.1	6	7			76		-3233	Lawver1991	https://doi.org/10.1594/PANGAEA.805004	S3	Unconsolidated sediments
-61.8517	-39.2733	3.11	6	7			84		-3096	Lawver1991	https://doi.org/10.1594/PANGAEA.805004	S3	Unconsolidated sediments
-61.8317	-39.685	3.2	7	7			82		-3376	Lawver1991	https://doi.org/10.1594/PANGAEA.805004	S3	Unconsolidated sediments
-61.835	-39.605	3.3	6	7			61		-3373	Lawver1991	https://doi.org/10.1594/PANGAEA.805004	S1	Unconsolidated sediments	3.3 no stable temperature profile (10.1029/90JB01721 Fig 6.)
-61.8267	-39.56	3.4	7	7			78		-3361	Lawver1991	https://doi.org/10.1594/PANGAEA.805004	S3	Unconsolidated sediments
-61.825	-39.5267	3.5	7	7			76		-3350	Lawver1991	https://doi.org/10.1594/PANGAEA.805004	S3	Unconsolidated sediments
-61.83	-39.5083	3.6	6	7			85		-3361	Lawver1991	https://doi.org/10.1594/PANGAEA.805004	S3	Unconsolidated sediments
-61.8433	-39.485	3.7	6	7			84		-3376	Lawver1991	https://doi.org/10.1594/PANGAEA.805004	S3	Unconsolidated sediments
-61.8483	-39.4417	3.8	6	7			78		-3275	Lawver1991	https://doi.org/10.1594/PANGAEA.805004	S3	Unconsolidated sediments
-61.8433	-39.3867	3.9	6	7			76		-3275	Lawver1991	https://doi.org/10.1594/PANGAEA.805004	S3	Unconsolidated sediments
-62.16	-41.545	4.1	7	7			88		-3411	Lawver1991	https://doi.org/10.1594/PANGAEA.805004	S3	Unconsolidated sediments
-62.1617	-41.4767	4.2					91		-3442	Lawver1991	https://doi.org/10.1594/PANGAEA.805004	S1	Unconsolidated sediments	no depth info
-62.15	-41.4633	5.1	4	4			81		-3447	Lawver1991	https://doi.org/10.1594/PANGAEA.805004	S2	Unconsolidated sediments
-62.1933	-41.025	5.1	3	4			76		-3341	Lawver1991	https://doi.org/10.1594/PANGAEA.805004	S2	Unconsolidated sediments
-62.2067	-40.9917	5.11	4	4			71		-3366	Lawver1991	https://doi.org/10.1594/PANGAEA.805004	S2	Unconsolidated sediments
-62.155	-41.41	5.2	4	4			73		-3414	Lawver1991	https://doi.org/10.1594/PANGAEA.805004	S2	Unconsolidated sediments
-62.1567	-41.355	5.3	4	4			63		-3416	Lawver1991	https://doi.org/10.1594/PANGAEA.805004	S2	Unconsolidated sediments
-62.165	-41.3	5.4	4	3			61		-3406	Lawver1991	https://doi.org/10.1594/PANGAEA.805004	S2	Unconsolidated sediments
-62.1683	-41.2217	5.5	4	3			59		-3398	Lawver1991	https://doi.org/10.1594/PANGAEA.805004	S2	Unconsolidated sediments
-62.17	-41.1583	5.6	4	4			87		-3366	Lawver1991	https://doi.org/10.1594/PANGAEA.805004	S2	Unconsolidated sediments
-62.1683	-41.105	5.7	4	3			72		-3311	Lawver1991	https://doi.org/10.1594/PANGAEA.805004	S2	Unconsolidated sediments
-62.1767	-41.075	5.8	4	3			78		-3321	Lawver1991	https://doi.org/10.1594/PANGAEA.805004	S2	Unconsolidated sediments
-62.1833	-41.055	5.9	4	3			72		-3330	Lawver1991	https://doi.org/10.1594/PANGAEA.805004	S2	Unconsolidated sediments
-62.1024	-50.4736						96		-3420	Lawver1994	https://doi.org/10.1594/PANGAEA.805003, http://www.mna.unisi.it/Editoria/TAP/TA_pdfs/Volume_01/TA_01_309_Lawver_etal.pdf	S1	Unconsolidated sediments	Elevation from Bedmachine
-62.0185	-50.1592						83		-3383	Lawver1994	https://doi.org/10.1594/PANGAEA.805003, http://www.mna.unisi.it/Editoria/TAP/TA_pdfs/Volume_01/TA_01_309_Lawver_etal.pdf	S1	Unconsolidated sediments	Elevation from Bedmachine
-62.7094	-50.3848						77		-3386	Lawver1994	https://doi.org/10.1594/PANGAEA.805003, http://www.mna.unisi.it/Editoria/TAP/TA_pdfs/Volume_01/TA_01_309_Lawver_etal.pdf	S1	Unconsolidated sediments	Elevation from Bedmachine
-61.8925	-49.626						76		-3285	Lawver1994	https://doi.org/10.1594/PANGAEA.805003, http://www.mna.unisi.it/Editoria/TAP/TA_pdfs/Volume_01/TA_01_309_Lawver_etal.pdf	S1	Unconsolidated sediments	Elevation from Bedmachine
-62.2208	-49.1612						75		-3348	Lawver1994	https://doi.org/10.1594/PANGAEA.805003, http://www.mna.unisi.it/Editoria/TAP/TA_pdfs/Volume_01/TA_01_309_Lawver_etal.pdf	S1	Unconsolidated sediments	Elevation from Bedmachine
-62.0261	-48.4093						74		-3338	Lawver1994	https://doi.org/10.1594/PANGAEA.805003, http://www.mna.unisi.it/Editoria/TAP/TA_pdfs/Volume_01/TA_01_309_Lawver_etal.pdf	S1	Unconsolidated sediments	Elevation from Bedmachine
-62.4146	-58.1262	Bransfield					192			Lawver1995	https://doi.org/10.1594/PANGAEA.807229	S1	Unconsolidated sediments	Methods for estimating heat flow not documented in detail in publication. Elevation below -1000m. Conservative classification of S1, but S2 or S3 likely
-62.3918	-58.0471	Bransfield					112			Lawver1995	https://doi.org/10.1594/PANGAEA.807229	S1	Unconsolidated sediments	Methods for estimating heat flow not documented in detail in publication. Elevation below -1000m. Conservative classification of S1, but S2 or S3 likely
-62.3685	-58.0482	Bransfield					71			Lawver1995	https://doi.org/10.1594/PANGAEA.807229	S1	Unconsolidated sediments	Methods for estimating heat flow not documented in detail in publication. Elevation below -1000m. Conservative classification of S1, but S2 or S3 likely
-62.3514	-58.0405	Bransfield					79			Lawver1995	https://doi.org/10.1594/PANGAEA.807229	S1	Unconsolidated sediments	Methods for estimating heat flow not documented in detail in publication. Elevation below -1000m. Conservative classification of S1, but S2 or S3 likely
-62.3374	-58.0065	Bransfield					69			Lawver1995	https://doi.org/10.1594/PANGAEA.807229	S1	Unconsolidated sediments	Methods for estimating heat flow not documented in detail in publication. Elevation below -1000m. Conservative classification of S1, but S2 or S3 likely
-62.3242	-57.9736	Bransfield					133			Lawver1995	https://doi.org/10.1594/PANGAEA.807229	S1	Unconsolidated sediments	Methods for estimating heat flow not documented in detail in publication. Elevation below -1000m. Conservative classification of S1, but S2 or S3 likely
-62.3126	-57.9308	Bransfield					246			Lawver1995	https://doi.org/10.1594/PANGAEA.807229	S1	Unconsolidated sediments	Methods for estimating heat flow not documented in detail in publication. Elevation below -1000m. Conservative classification of S1, but S2 or S3 likely
-62.2961	-57.9055	Bransfield					149			Lawver1995	https://doi.org/10.1594/PANGAEA.807229	S1	Unconsolidated sediments	Methods for estimating heat flow not documented in detail in publication. Elevation below -1000m. Conservative classification of S1, but S2 or S3 likely
-62.28	-57.8869	Bransfield					94			Lawver1995	https://doi.org/10.1594/PANGAEA.807229	S1	Unconsolidated sediments	Methods for estimating heat flow not documented in detail in publication. Elevation below -1000m. Conservative classification of S1, but S2 or S3 likely
-62.3942	-57.9571	Bransfield					203			Lawver1995	https://doi.org/10.1594/PANGAEA.807229	S1	Unconsolidated sediments	Methods for estimating heat flow not documented in detail in publication. Elevation below -1000m. Conservative classification of S1, but S2 or S3 likely
-62.3806	-57.877	Bransfield					291			Lawver1995	https://doi.org/10.1594/PANGAEA.807229	S1	Unconsolidated sediments	Methods for estimating heat flow not documented in detail in publication. Elevation below -1000m. Conservative classification of S1, but S2 or S3 likely
-62.3514	-57.8693	Bransfield					175			Lawver1995	https://doi.org/10.1594/PANGAEA.807229	S1	Unconsolidated sediments	Methods for estimating heat flow not documented in detail in publication. Elevation below -1000m. Conservative classification of S1, but S2 or S3 likely
-62.3354	-57.8902	Bransfield					228			Lawver1995	https://doi.org/10.1594/PANGAEA.807229	S1	Unconsolidated sediments	Methods for estimating heat flow not documented in detail in publication. Elevation below -1000m. Conservative classification of S1, but S2 or S3 likely
-62.3199	-57.8693	Bransfield					186			Lawver1995	https://doi.org/10.1594/PANGAEA.807229	S1	Unconsolidated sediments	Methods for estimating heat flow not documented in detail in publication. Elevation below -1000m. Conservative classification of S1, but S2 or S3 likely
-62.3053	-57.8419	Bransfield					140			Lawver1995	https://doi.org/10.1594/PANGAEA.807229	S1	Unconsolidated sediments	Methods for estimating heat flow not documented in detail in publication. Elevation below -1000m. Conservative classification of S1, but S2 or S3 likely
-62.2824	-57.8254	Bransfield					156			Lawver1995	https://doi.org/10.1594/PANGAEA.807229	S1	Unconsolidated sediments	Methods for estimating heat flow not documented in detail in publication. Elevation below -1000m. Conservative classification of S1, but S2 or S3 likely
-62.2752	-57.8067	Bransfield					147			Lawver1995	https://doi.org/10.1594/PANGAEA.807229	S1	Unconsolidated sediments	Methods for estimating heat flow not documented in detail in publication. Elevation below -1000m. Conservative classification of S1, but S2 or S3 likely
-62.2625	-57.7936	Bransfield					165			Lawver1995	https://doi.org/10.1594/PANGAEA.807229	S1	Unconsolidated sediments	Methods for estimating heat flow not documented in detail in publication. Elevation below -1000m. Conservative classification of S1, but S2 or S3 likely
-62.2552	-57.7442	Bransfield					158			Lawver1995	https://doi.org/10.1594/PANGAEA.807229	S1	Unconsolidated sediments	Methods for estimating heat flow not documented in detail in publication. Elevation below -1000m. Conservative classification of S1, but S2 or S3 likely
-62.2407	-57.7321	Bransfield					161			Lawver1995	https://doi.org/10.1594/PANGAEA.807229	S1	Unconsolidated sediments	Methods for estimating heat flow not documented in detail in publication. Elevation below -1000m. Conservative classification of S1, but S2 or S3 likely
-62.2353	-57.686	Bransfield					187			Lawver1995	https://doi.org/10.1594/PANGAEA.807229	S1	Unconsolidated sediments	Methods for estimating heat flow not documented in detail in publication. Elevation below -1000m. Conservative classification of S1, but S2 or S3 likely
-62.2256	-57.663	Bransfield					411			Lawver1995	https://doi.org/10.1594/PANGAEA.807229	S1	Unconsolidated sediments	Methods for estimating heat flow not documented in detail in publication. Elevation below -1000m. Conservative classification of S1, but S2 or S3 likely
-62.3597	-57.8496	Bransfield					219			Lawver1995	https://doi.org/10.1594/PANGAEA.807229	S1	Unconsolidated sediments	Methods for estimating heat flow not documented in detail in publication. Elevation below -1000m. Conservative classification of S1, but S2 or S3 likely
-62.3534	-57.8287	Bransfield					179			Lawver1995	https://doi.org/10.1594/PANGAEA.807229	S1	Unconsolidated sediments	Methods for estimating heat flow not documented in detail in publication. Elevation below -1000m. Conservative classification of S1, but S2 or S3 likely
-62.3383	-57.8254	Bransfield					149			Lawver1995	https://doi.org/10.1594/PANGAEA.807229	S1	Unconsolidated sediments	Methods for estimating heat flow not documented in detail in publication. Elevation below -1000m. Conservative classification of S1, but S2 or S3 likely
-62.3257	-57.8276	Bransfield					226			Lawver1995	https://doi.org/10.1594/PANGAEA.807229	S1	Unconsolidated sediments	Methods for estimating heat flow not documented in detail in publication. Elevation below -1000m. Conservative classification of S1, but S2 or S3 likely
-62.3009	-57.7782	Bransfield					264			Lawver1995	https://doi.org/10.1594/PANGAEA.807229	S1	Unconsolidated sediments	Methods for estimating heat flow not documented in detail in publication. Elevation below -1000m. Conservative classification of S1, but S2 or S3 likely
-62.2927	-57.7409	Bransfield					344			Lawver1995	https://doi.org/10.1594/PANGAEA.807229	S1	Unconsolidated sediments	Methods for estimating heat flow not documented in detail in publication. Elevation below -1000m. Conservative classification of S1, but S2 or S3 likely
-62.2781	-57.7387	Bransfield					271			Lawver1995	https://doi.org/10.1594/PANGAEA.807229	S1	Unconsolidated sediments	Methods for estimating heat flow not documented in detail in publication. Elevation below -1000m. Conservative classification of S1, but S2 or S3 likely
-62.2664	-57.6959	Bransfield					284			Lawver1995	https://doi.org/10.1594/PANGAEA.807229	S1	Unconsolidated sediments	Methods for estimating heat flow not documented in detail in publication. Elevation below -1000m. Conservative classification of S1, but S2 or S3 likely
-62.2543	-57.6739	Bransfield					191			Lawver1995	https://doi.org/10.1594/PANGAEA.807229	S1	Unconsolidated sediments	Methods for estimating heat flow not documented in detail in publication. Elevation below -1000m. Conservative classification of S1, but S2 or S3 likely
-62.245	-57.6158	Bransfield					179			Lawver1995	https://doi.org/10.1594/PANGAEA.807229	S1	Unconsolidated sediments	Methods for estimating heat flow not documented in detail in publication. Elevation below -1000m. Conservative classification of S1, but S2 or S3 likely
-62.351	-57.742	Bransfield					317			Lawver1995	https://doi.org/10.1594/PANGAEA.807229	S1	Unconsolidated sediments	Methods for estimating heat flow not documented in detail in publication. Elevation below -1000m. Conservative classification of S1, but S2 or S3 likely
-62.3335	-57.7288	Bransfield					201			Lawver1995	https://doi.org/10.1594/PANGAEA.807229	S1	Unconsolidated sediments	Methods for estimating heat flow not documented in detail in publication. Elevation below -1000m. Conservative classification of S1, but S2 or S3 likely
-62.3237	-57.7299	Bransfield					178			Lawver1995	https://doi.org/10.1594/PANGAEA.807229	S1	Unconsolidated sediments	Methods for estimating heat flow not documented in detail in publication. Elevation below -1000m. Conservative classification of S1, but S2 or S3 likely
-62.3131	-57.7178	Bransfield					164			Lawver1995	https://doi.org/10.1594/PANGAEA.807229	S1	Unconsolidated sediments	Methods for estimating heat flow not documented in detail in publication. Elevation below -1000m. Conservative classification of S1, but S2 or S3 likely
-62.3077	-57.7222	Bransfield					270			Lawver1995	https://doi.org/10.1594/PANGAEA.807229	S1	Unconsolidated sediments	Methods for estimating heat flow not documented in detail in publication. Elevation below -1000m. Conservative classification of S1, but S2 or S3 likely
-62.3053	-57.7156	Bransfield					211			Lawver1995	https://doi.org/10.1594/PANGAEA.807229	S1	Unconsolidated sediments	Methods for estimating heat flow not documented in detail in publication. Elevation below -1000m. Conservative classification of S1, but S2 or S3 likely
-62.3135	-57.7025	Bransfield					162			Lawver1995	https://doi.org/10.1594/PANGAEA.807229	S1	Unconsolidated sediments	Methods for estimating heat flow not documented in detail in publication. Elevation below -1000m. Conservative classification of S1, but S2 or S3 likely
-62.3097	-57.6937	Bransfield					626			Lawver1995	https://doi.org/10.1594/PANGAEA.807229	S1	Unconsolidated sediments	hydrothermal circulation
-62.2927	-57.663	Bransfield					263			Lawver1995	https://doi.org/10.1594/PANGAEA.807229	S1	Unconsolidated sediments	Methods for estimating heat flow not documented in detail in publication. Elevation below -1000m. Conservative classification of S1, but S2 or S3 likely
-62.2878	-57.6673	Bransfield					331			Lawver1995	https://doi.org/10.1594/PANGAEA.807229	S1	Unconsolidated sediments	Methods for estimating heat flow not documented in detail in publication. Elevation below -1000m. Conservative classification of S1, but S2 or S3 likely
-62.2771	-57.6717	Bransfield					214			Lawver1995	https://doi.org/10.1594/PANGAEA.807229	S1	Unconsolidated sediments	Methods for estimating heat flow not documented in detail in publication. Elevation below -1000m. Conservative classification of S1, but S2 or S3 likely
-62.2659	-57.6608	Bransfield					273			Lawver1995	https://doi.org/10.1594/PANGAEA.807229	S1	Unconsolidated sediments	Methods for estimating heat flow not documented in detail in publication. Elevation below -1000m. Conservative classification of S1, but S2 or S3 likely
-62.2261	-57.5609	Bransfield					89			Lawver1995	https://doi.org/10.1594/PANGAEA.807229	S1	Unconsolidated sediments	Methods for estimating heat flow not documented in detail in publication. Elevation below -1000m. Conservative classification of S1, but S2 or S3 likely
-62.2897	-57.596	Bransfield					160			Lawver1995	https://doi.org/10.1594/PANGAEA.807229	S1	Unconsolidated sediments	Methods for estimating heat flow not documented in detail in publication. Elevation below -1000m. Conservative classification of S1, but S2 or S3 likely
-62.2805	-57.5686	Bransfield					49			Lawver1995	https://doi.org/10.1594/PANGAEA.807229	S1	Unconsolidated sediments	Methods for estimating heat flow not documented in detail in publication. Elevation below -1000m. Conservative classification of S1, but S2 or S3 likely
-62.2664	-57.5707	Bransfield					199			Lawver1995	https://doi.org/10.1594/PANGAEA.807229	S1	Unconsolidated sediments	Methods for estimating heat flow not documented in detail in publication. Elevation below -1000m. Conservative classification of S1, but S2 or S3 likely
-62.2509	-57.5576	Bransfield					181			Lawver1995	https://doi.org/10.1594/PANGAEA.807229	S1	Unconsolidated sediments	Methods for estimating heat flow not documented in detail in publication. Elevation below -1000m. Conservative classification of S1, but S2 or S3 likely
-62.2363	-57.5477	Bransfield					132			Lawver1995	https://doi.org/10.1594/PANGAEA.807229	S1	Unconsolidated sediments	Methods for estimating heat flow not documented in detail in publication. Elevation below -1000m. Conservative classification of S1, but S2 or S3 likely
-62.2207	-57.5268	Bransfield					80			Lawver1995	https://doi.org/10.1594/PANGAEA.807229	S1	Unconsolidated sediments	Methods for estimating heat flow not documented in detail in publication. Elevation below -1000m. Conservative classification of S1, but S2 or S3 likely
-62.1969	-57.5159	Bransfield					116			Lawver1995	https://doi.org/10.1594/PANGAEA.807229	S1	Unconsolidated sediments	Methods for estimating heat flow not documented in detail in publication. Elevation below -1000m. Conservative classification of S1, but S2 or S3 likely
-62.1896	-57.5126	Bransfield					102			Lawver1995	https://doi.org/10.1594/PANGAEA.807229	S1	Unconsolidated sediments	Methods for estimating heat flow not documented in detail in publication. Elevation below -1000m. Conservative classification of S1, but S2 or S3 likely
-62.1872	-57.4577	Bransfield					209			Lawver1995	https://doi.org/10.1594/PANGAEA.807229	S1	Unconsolidated sediments	Methods for estimating heat flow not documented in detail in publication. Elevation below -1000m. Conservative classification of S1, but S2 or S3 likely
-54.7033	-2.0917	CH74-36		10	89	0.84	74		-3140	Lee1975	https://doi.org/10.1029/GL002i006p00201	S2	Unconsolidated sediments	no proven stable temperature profile but high water depth
-55.3383	-1.5983	CH74-39		2.5	20	0.84	17		-4010	Lee1975	https://doi.org/10.1029/GL002i006p00201	S1	Unconsolidated sediments
-56.025	-4.5467	CH74-40		2.5	232	0.84	194		-2204	Lee1975	https://doi.org/10.1029/GL002i006p00201	S1	Unconsolidated sediments
-55.395	-2.02	CH74-42		2	267	0.84	223		-2310	Lee1975	https://doi.org/10.1029/GL002i006p00201	S1	Unconsolidated sediments
-55.13	0.2933	CH74-45A		2.5	204	0.84	171		-3000	Lee1975	https://doi.org/10.1029/GL002i006p00201	S1	Unconsolidated sediments
-55.13	0.2933	CH74-45B		2.5	199	0.84	167		-3000	Lee1975	https://doi.org/10.1029/GL002i006p00201	S1	Unconsolidated sediments
-54.18	2.1867	CH74-49A		2	88	0.84	74		-4790	Lee1975	https://doi.org/10.1029/GL002i006p00201	S1	Unconsolidated sediments
-54.18	2.1867	CH74-49B		2	71	0.84	59		-4790	Lee1975	https://doi.org/10.1029/GL002i006p00201	S1	Unconsolidated sediments
-54.21	4.075	CH74-50		2	84	0.84	70		-1960	Lee1975	https://doi.org/10.1029/GL002i006p00201	S1	Unconsolidated sediments
-52.3283	6.5017	CH74-51		10	66	0.84	55		-3690	Lee1975	https://doi.org/10.1029/GL002i006p00201	S2	Unconsolidated sediments	no proven stable temperature profile but high water depth
-52.285	6.5633	CH74-52A		2.5	18	0.84	15		-3580	Lee1975	https://doi.org/10.1029/GL002i006p00201	S1	Unconsolidated sediments
-52.285	6.5633	CH74-52B		2.5	13	0.84	11		-3580	Lee1975	https://doi.org/10.1029/GL002i006p00201	S1	Unconsolidated sediments
-52.285	6.5633	CH74-52C		2.5	18	0.84	15		-3580	Lee1975	https://doi.org/10.1029/GL002i006p00201	S1	Unconsolidated sediments
-51.56	7.7367	CH74-53A		2.5	21	0.84	17		-3640	Lee1975	https://doi.org/10.1029/GL002i006p00201	S1	Unconsolidated sediments
-51.56	7.7367	CH74-53B		2.5	20	0.84	17		-3640	Lee1975	https://doi.org/10.1029/GL002i006p00201	S1	Unconsolidated sediments
-74.2175	-173.633	U1524	51.5	137	58	0.93	53.7			McKay2018	http://publications.iodp.org/preliminary_report/374/374PR.PDF	R2	Bedrock borehole
-77.8894	167.089	ANDRILL AND-1B	0	1285	67.7	1.5	115			Morin2010	https://doi.org/10.1130/ges00512.1	R3	Bedrock borehole
-64.2017	-57.685	James Ross Island	0	363.9			50			Mulvaney2012	https://doi.org/10.1038/nature11391	I2	Ice borehole	Derived from a basal temperature measurement
-69.2233	38.675	JARE22-1		1	-28	1.1	-31		-666	Nagao1983	https://doi.pangaea.de/10.1594/PANGAEA.808070	R1	Bedrock borehole
-69.2233	38.82	JARE22-2		1	1	1.1	9		-778	Nagao1983	https://doi.pangaea.de/10.1594/PANGAEA.808070	R1	Bedrock borehole
-69.3433	39.6067	JARE22-3		1	186	0.99	184		-668	Nagao1983	https://doi.pangaea.de/10.1594/PANGAEA.808070	R1	Bedrock borehole
-69.375	39.6817	JARE22-4		1	197	0.96	190		-683	Nagao1983	https://doi.pangaea.de/10.1594/PANGAEA.808070	R1	Bedrock borehole
-69.0067	39.6633	JARE22-5		1	53	0.94	50		-537	Nagao1983	https://doi.pangaea.de/10.1594/PANGAEA.808070	R1	Bedrock borehole
-64.517	3.0999	113-689B		297		1.152	114	14		Nagao1990	https://doi.org/10.2973/odp.proc.sr.113.183.1990	R2	Bedrock borehole
-65.161	1.2049	113-690B		84	17	1.44	45			Nagao1990	https://doi.org/10.2973/odp.proc.sr.113.183.1990	R1	Bedrock borehole	this is a minimum heat flow value, how-ever, and the errors associated with it are large
-63.68	-97.99	TH80-PC101			72	0.8	55		-5010	Nagao2002	https://doi.org/10.2183/pjab.78.19	S1	Unconsolidated sediments	The temperature gradient was measured with the 5 to 8 meter-long probes attached to a gravity corer. Sometimes, temperature gradient data have been seriously affected by some non-steady bottom temperature.
-65.99	-97.97	TH80-PC103			43	1.3	57		-4786	Nagao2002	https://doi.org/10.2183/pjab.78.19	S1	Unconsolidated sediments	The temperature gradient was measured with the 5 to 8 meter-long probes attached to a gravity corer. Sometimes, temperature gradient data have been seriously affected by some non-steady bottom temperature.
-67.78	-80.97	TH80-PC104			80	1	79		-3980	Nagao2002	https://doi.org/10.2183/pjab.78.19	S1	Unconsolidated sediments	The temperature gradient was measured with the 5 to 8 meter-long probes attached to a gravity corer. Sometimes, temperature gradient data have been seriously affected by some non-steady bottom temperature.
-65.81	-71.87	TH80-PC106			66	1.1	74		-3355	Nagao2002	https://doi.org/10.2183/pjab.78.19	S1	Unconsolidated sediments	The temperature gradient was measured with the 5 to 8 meter-long probes attached to a gravity corer. Sometimes, temperature gradient data have been seriously affected by some non-steady bottom temperature.
-67.71	-81.55	TH80-PC107			83	1	82		-3937	Nagao2002	https://doi.org/10.2183/pjab.78.19	S1	Unconsolidated sediments	The temperature gradient was measured with the 5 to 8 meter-long probes attached to a gravity corer. Sometimes, temperature gradient data have been seriously affected by some non-steady bottom temperature.
-65.82	-84.67	TH80-PC108			56	1	56		-4525	Nagao2002	https://doi.org/10.2183/pjab.78.19	S1	Unconsolidated sediments	The temperature gradient was measured with the 5 to 8 meter-long probes attached to a gravity corer. Sometimes, temperature gradient data have been seriously affected by some non-steady bottom temperature.
-65.91	-104.51	TH80-PC109			67	0.9	60		-4859	Nagao2002	https://doi.org/10.2183/pjab.78.19	S1	Unconsolidated sediments	The temperature gradient was measured with the 5 to 8 meter-long probes attached to a gravity corer. Sometimes, temperature gradient data have been seriously affected by some non-steady bottom temperature.
-62.56	-9.31	TH81-PC201			21	1.3	27		-5252	Nagao2002	https://doi.org/10.2183/pjab.78.19	S1	Unconsolidated sediments	The temperature gradient was measured with the 5 to 8 meter-long probes attached to a gravity corer. Sometimes, temperature gradient data have been seriously affected by some non-steady bottom temperature.
-69.41	-5.28	TH81-PC203			15	1.1	17		-1794	Nagao2002	https://doi.org/10.2183/pjab.78.19	S1	Unconsolidated sediments	The temperature gradient was measured with the 5 to 8 meter-long probes attached to a gravity corer. Sometimes, temperature gradient data have been seriously affected by some non-steady bottom temperature.
-69.56	-5.34	TH81-PC204			12	1.1	13		-1844	Nagao2002	https://doi.org/10.2183/pjab.78.19	S1	Unconsolidated sediments	The temperature gradient was measured with the 5 to 8 meter-long probes attached to a gravity corer. Sometimes, temperature gradient data have been seriously affected by some non-steady bottom temperature.
-69.9	-34.21	TH81-PC208			75	1.1	85		-4360	Nagao2002	https://doi.org/10.2183/pjab.78.19	S1	Unconsolidated sediments	The temperature gradient was measured with the 5 to 8 meter-long probes attached to a gravity corer. Sometimes, temperature gradient data have been seriously affected by some non-steady bottom temperature.
-69.89	-34.24	TH81-PC209			83	1.1	91		-4364	Nagao2002	https://doi.org/10.2183/pjab.78.19	S1	Unconsolidated sediments	The temperature gradient was measured with the 5 to 8 meter-long probes attached to a gravity corer. Sometimes, temperature gradient data have been seriously affected by some non-steady bottom temperature.
-77.12	-176.72	TH82-HF301			54	1.4	74		-638	Nagao2002	https://doi.org/10.2183/pjab.78.19	S1	Unconsolidated sediments	The temperature gradient was measured with the 5 to 8 meter-long probes attached to a gravity corer. Sometimes, temperature gradient data have been seriously affected by some non-steady bottom temperature.
-77.11	-178.03	TH82-HF302			85	1.4	121		-597	Nagao2002	https://doi.org/10.2183/pjab.78.19	S1	Unconsolidated sediments	The temperature gradient was measured with the 5 to 8 meter-long probes attached to a gravity corer. Sometimes, temperature gradient data have been seriously affected by some non-steady bottom temperature.
-77.11	179	TH82-HF304			97	1.2	117		-692	Nagao2002	https://doi.org/10.2183/pjab.78.19	S1	Unconsolidated sediments	The temperature gradient was measured with the 5 to 8 meter-long probes attached to a gravity corer. Sometimes, temperature gradient data have been seriously affected by some non-steady bottom temperature.
-76.7	-179.96	TH82-HF305			87	1.3	110		-602	Nagao2002	https://doi.org/10.2183/pjab.78.19	S1	Unconsolidated sediments	The temperature gradient was measured with the 5 to 8 meter-long probes attached to a gravity corer. Sometimes, temperature gradient data have been seriously affected by some non-steady bottom temperature.
-62.83	137.01	TH83-PC401			57	1	56		-3816	Nagao2002	https://doi.org/10.2183/pjab.78.19	S1	Unconsolidated sediments	The temperature gradient was measured with the 5 to 8 meter-long probes attached to a gravity corer. Sometimes, temperature gradient data have been seriously affected by some non-steady bottom temperature.
-63.89	127.88	TH83-PC402			42	1	43		-3667	Nagao2002	https://doi.org/10.2183/pjab.78.19	S1	Unconsolidated sediments	The temperature gradient was measured with the 5 to 8 meter-long probes attached to a gravity corer. Sometimes, temperature gradient data have been seriously affected by some non-steady bottom temperature.
-60.89	104.05	TH83-PC403			75	0.8	63		-4432	Nagao2002	https://doi.org/10.2183/pjab.78.19	S1	Unconsolidated sediments	The temperature gradient was measured with the 5 to 8 meter-long probes attached to a gravity corer. Sometimes, temperature gradient data have been seriously affected by some non-steady bottom temperature.
-63.93	105.15	TH83-PC404			98	0.9	85		-3536	Nagao2002	https://doi.org/10.2183/pjab.78.19	S1	Unconsolidated sediments	The temperature gradient was measured with the 5 to 8 meter-long probes attached to a gravity corer. Sometimes, temperature gradient data have been seriously affected by some non-steady bottom temperature.
-62.63	108	TH83-PC405			85	0.8	68		-3868	Nagao2002	https://doi.org/10.2183/pjab.78.19	S1	Unconsolidated sediments	The temperature gradient was measured with the 5 to 8 meter-long probes attached to a gravity corer. Sometimes, temperature gradient data have been seriously affected by some non-steady bottom temperature.
-63.89	127.84	TH83-PC406			72	1	72		-3671	Nagao2002	https://doi.org/10.2183/pjab.78.19	S1	Unconsolidated sediments	The temperature gradient was measured with the 5 to 8 meter-long probes attached to a gravity corer. Sometimes, temperature gradient data have been seriously affected by some non-steady bottom temperature.
-64.82	127.76	TH83-PC407			17	1	16		-2227	Nagao2002	https://doi.org/10.2183/pjab.78.19	S1	Unconsolidated sediments	The temperature gradient was measured with the 5 to 8 meter-long probes attached to a gravity corer. Sometimes, temperature gradient data have been seriously affected by some non-steady bottom temperature.
-64.21	75.01	TH84-PC502			81	1	57		-591	Nagao2002	https://doi.org/10.2183/pjab.78.19	S1	Unconsolidated sediments	The temperature gradient was measured with the 5 to 8 meter-long probes attached to a gravity corer. Sometimes, temperature gradient data have been seriously affected by some non-steady bottom temperature.
-65.83	78.99	TH84-PC503			59	1	56		-3538	Nagao2002	https://doi.org/10.2183/pjab.78.19	S1	Unconsolidated sediments	The temperature gradient was measured with the 5 to 8 meter-long probes attached to a gravity corer. Sometimes, temperature gradient data have been seriously affected by some non-steady bottom temperature.
-65.86	69.87	TH84-PC505			59	1	45		-3119	Nagao2002	https://doi.org/10.2183/pjab.78.19	S1	Unconsolidated sediments	The temperature gradient was measured with the 5 to 8 meter-long probes attached to a gravity corer. Sometimes, temperature gradient data have been seriously affected by some non-steady bottom temperature.
-67.5	73	TH84-HF501			43	1.1	94		-2481	Nagao2002	https://doi.org/10.2183/pjab.78.19	S1	Unconsolidated sediments	The temperature gradient was measured with the 5 to 8 meter-long probes attached to a gravity corer. Sometimes, temperature gradient data have been seriously affected by some non-steady bottom temperature.
-62.81	75.12	TH84-PC507			52	1	52		-3805	Nagao2002	https://doi.org/10.2183/pjab.78.19	S1	Unconsolidated sediments	The temperature gradient was measured with the 5 to 8 meter-long probes attached to a gravity corer. Sometimes, temperature gradient data have been seriously affected by some non-steady bottom temperature.
-60.93	40.01	TH85-PC601			59	0.9	53		-4640	Nagao2002	https://doi.org/10.2183/pjab.78.19	S1	Unconsolidated sediments	The temperature gradient was measured with the 5 to 8 meter-long probes attached to a gravity corer. Sometimes, temperature gradient data have been seriously affected by some non-steady bottom temperature.
-66	43.13	TH85-PC603			60	0.9	46		-5281	Nagao2002	https://doi.org/10.2183/pjab.78.19	S1	Unconsolidated sediments	The temperature gradient was measured with the 5 to 8 meter-long probes attached to a gravity corer. Sometimes, temperature gradient data have been seriously affected by some non-steady bottom temperature.
-65.73	40.02	TH85-HF601			54	0.8	48		-3157	Nagao2002	https://doi.org/10.2183/pjab.78.19	S1	Unconsolidated sediments	The temperature gradient was measured with the 5 to 8 meter-long probes attached to a gravity corer. Sometimes, temperature gradient data have been seriously affected by some non-steady bottom temperature.
-67.41	24.04	TH85-PC605			75	0.9	68		-4418	Nagao2002	https://doi.org/10.2183/pjab.78.19	S1	Unconsolidated sediments	The temperature gradient was measured with the 5 to 8 meter-long probes attached to a gravity corer. Sometimes, temperature gradient data have been seriously affected by some non-steady bottom temperature.
-66.09	27.55	TH85-PC606			51	0.8	43		-4791	Nagao2002	https://doi.org/10.2183/pjab.78.19	S1	Unconsolidated sediments	The temperature gradient was measured with the 5 to 8 meter-long probes attached to a gravity corer. Sometimes, temperature gradient data have been seriously affected by some non-steady bottom temperature.
-62.74	-58.99	TH88-GC901			205	0.8	172		-1455	Nagao2002	https://doi.org/10.2183/pjab.78.19	S1	Unconsolidated sediments	The temperature gradient was measured with the 5 to 8 meter-long probes attached to a gravity corer. Sometimes, temperature gradient data have been seriously affected by some non-steady bottom temperature.
-61.7	-55.09	TH88-GC902			127	0.8	107		-2173	Nagao2002	https://doi.org/10.2183/pjab.78.19	S1	Unconsolidated sediments	The temperature gradient was measured with the 5 to 8 meter-long probes attached to a gravity corer. Sometimes, temperature gradient data have been seriously affected by some non-steady bottom temperature.
-60.53	-61.3	TH88-GC903			106	1	111		-3639	Nagao2002	https://doi.org/10.2183/pjab.78.19	S1	Unconsolidated sediments	The temperature gradient was measured with the 5 to 8 meter-long probes attached to a gravity corer. Sometimes, temperature gradient data have been seriously affected by some non-steady bottom temperature.
-61.76	-59.69	TH88-GC904			70	0.9	64		-1687	Nagao2002	https://doi.org/10.2183/pjab.78.19	S1	Unconsolidated sediments	The temperature gradient was measured with the 5 to 8 meter-long probes attached to a gravity corer. Sometimes, temperature gradient data have been seriously affected by some non-steady bottom temperature.
-64.42	-63.69	TH88-GC905			137	1	133		-510	Nagao2002	https://doi.org/10.2183/pjab.78.19	S1	Unconsolidated sediments	The temperature gradient was measured with the 5 to 8 meter-long probes attached to a gravity corer. Sometimes, temperature gradient data have been seriously affected by some non-steady bottom temperature.
-62.28	-57.92	TH88-GC906			484	0.9	416		-1940	Nagao2002	https://doi.org/10.2183/pjab.78.19	S1	Unconsolidated sediments	The temperature gradient was measured with the 5 to 8 meter-long probes attached to a gravity corer. Sometimes, temperature gradient data have been seriously affected by some non-steady bottom temperature.
-62.64	-58.44	TH88-GC907			170	0.8	141		-1623	Nagao2002	https://doi.org/10.2183/pjab.78.19	S1	Unconsolidated sediments	The temperature gradient was measured with the 5 to 8 meter-long probes attached to a gravity corer. Sometimes, temperature gradient data have been seriously affected by some non-steady bottom temperature.
-63.4	-61.58	TH88-GC908			152	0.9	135		-1099	Nagao2002	https://doi.org/10.2183/pjab.78.19	S1	Unconsolidated sediments	The temperature gradient was measured with the 5 to 8 meter-long probes attached to a gravity corer. Sometimes, temperature gradient data have been seriously affected by some non-steady bottom temperature.
-60.99	80.31	TH89-GC1001			134	0.9	122		-2363	Nagao2002	https://doi.org/10.2183/pjab.78.19	S1	Unconsolidated sediments	The temperature gradient was measured with the 5 to 8 meter-long probes attached to a gravity corer. Sometimes, temperature gradient data have been seriously affected by some non-steady bottom temperature.
-63.8	78.89	TH89-GC1002			56	1.1	64		-3658	Nagao2002	https://doi.org/10.2183/pjab.78.19	S1	Unconsolidated sediments	The temperature gradient was measured with the 5 to 8 meter-long probes attached to a gravity corer. Sometimes, temperature gradient data have been seriously affected by some non-steady bottom temperature.
-63.12	81.05	TH89-GC1003			57	1.1	67		-3327	Nagao2002	https://doi.org/10.2183/pjab.78.19	S1	Unconsolidated sediments	The temperature gradient was measured with the 5 to 8 meter-long probes attached to a gravity corer. Sometimes, temperature gradient data have been seriously affected by some non-steady bottom temperature.
-68.86	74.99	TH89-GC1004			121	0.9	111		-721	Nagao2002	https://doi.org/10.2183/pjab.78.19	S1	Unconsolidated sediments	The temperature gradient was measured with the 5 to 8 meter-long probes attached to a gravity corer. Sometimes, temperature gradient data have been seriously affected by some non-steady bottom temperature.
-68.24	72.5	TH89-GC1006			83	1	82		-805	Nagao2002	https://doi.org/10.2183/pjab.78.19	S1	Unconsolidated sediments	The temperature gradient was measured with the 5 to 8 meter-long probes attached to a gravity corer. Sometimes, temperature gradient data have been seriously affected by some non-steady bottom temperature.
-64.82	145.01	TH92-GC1301			56	1	56		-3341	Nagao2002	https://doi.org/10.2183/pjab.78.19	S1	Unconsolidated sediments	The temperature gradient was measured with the 5 to 8 meter-long probes attached to a gravity corer. Sometimes, temperature gradient data have been seriously affected by some non-steady bottom temperature.
-77.44	-161.18	TH92-GC1303			52	2	103		-672	Nagao2002	https://doi.org/10.2183/pjab.78.19	S1	Unconsolidated sediments	The temperature gradient was measured with the 5 to 8 meter-long probes attached to a gravity corer. Sometimes, temperature gradient data have been seriously affected by some non-steady bottom temperature.
-77.43	-169.77	TH92-GC1305			66	1.5	97		-570	Nagao2002	https://doi.org/10.2183/pjab.78.19	S1	Unconsolidated sediments	The temperature gradient was measured with the 5 to 8 meter-long probes attached to a gravity corer. Sometimes, temperature gradient data have been seriously affected by some non-steady bottom temperature.
-62.66	136.56	TH93-GC1401			49	0.9	46		-3990	Nagao2002	https://doi.org/10.2183/pjab.78.19	S1	Unconsolidated sediments	The temperature gradient was measured with the 5 to 8 meter-long probes attached to a gravity corer. Sometimes, temperature gradient data have been seriously affected by some non-steady bottom temperature.
-65.05	133.28	TH93-GC1405			70	1.2	88		-575	Nagao2002	https://doi.org/10.2183/pjab.78.19	S1	Unconsolidated sediments	The temperature gradient was measured with the 5 to 8 meter-long probes attached to a gravity corer. Sometimes, temperature gradient data have been seriously affected by some non-steady bottom temperature.
-63.74	130.51	TH93-GC1407			70	1	70		-3687	Nagao2002	https://doi.org/10.2183/pjab.78.19	S1	Unconsolidated sediments	The temperature gradient was measured with the 5 to 8 meter-long probes attached to a gravity corer. Sometimes, temperature gradient data have been seriously affected by some non-steady bottom temperature.
-64.32	130.49	TH93-GC1408			68	1.2	82		-2220	Nagao2002	https://doi.org/10.2183/pjab.78.19	S1	Unconsolidated sediments	The temperature gradient was measured with the 5 to 8 meter-long probes attached to a gravity corer. Sometimes, temperature gradient data have been seriously affected by some non-steady bottom temperature.
-64.58	130.49	TH93-GC1409			58	1	57		-1318	Nagao2002	https://doi.org/10.2183/pjab.78.19	S1	Unconsolidated sediments	The temperature gradient was measured with the 5 to 8 meter-long probes attached to a gravity corer. Sometimes, temperature gradient data have been seriously affected by some non-steady bottom temperature.
-63.72	112.33	TH94-GC1501			55	1	53		-3060	Nagao2002	https://doi.org/10.2183/pjab.78.19	S1	Unconsolidated sediments	The temperature gradient was measured with the 5 to 8 meter-long probes attached to a gravity corer. Sometimes, temperature gradient data have been seriously affected by some non-steady bottom temperature.
-63.29	115.99	TH94-GC1503			50	1	49		-3368	Nagao2002	https://doi.org/10.2183/pjab.78.19	S1	Unconsolidated sediments	The temperature gradient was measured with the 5 to 8 meter-long probes attached to a gravity corer. Sometimes, temperature gradient data have been seriously affected by some non-steady bottom temperature.
-63.32	116	TH94-GC1504			48	1	49		-3310	Nagao2002	https://doi.org/10.2183/pjab.78.19	S1	Unconsolidated sediments	The temperature gradient was measured with the 5 to 8 meter-long probes attached to a gravity corer. Sometimes, temperature gradient data have been seriously affected by some non-steady bottom temperature.
-63.53	103.5	TH94-GC1505			78	0.9	71		-3607	Nagao2002	https://doi.org/10.2183/pjab.78.19	S1	Unconsolidated sediments	The temperature gradient was measured with the 5 to 8 meter-long probes attached to a gravity corer. Sometimes, temperature gradient data have been seriously affected by some non-steady bottom temperature.
-64.58	110.03	TH94-GC1507			43	1	44		-2604	Nagao2002	https://doi.org/10.2183/pjab.78.19	S1	Unconsolidated sediments	The temperature gradient was measured with the 5 to 8 meter-long probes attached to a gravity corer. Sometimes, temperature gradient data have been seriously affected by some non-steady bottom temperature.
-63.99	118.43	TH94-GC1508			57	1	54		-3232	Nagao2002	https://doi.org/10.2183/pjab.78.19	S1	Unconsolidated sediments	The temperature gradient was measured with the 5 to 8 meter-long probes attached to a gravity corer. Sometimes, temperature gradient data have been seriously affected by some non-steady bottom temperature.
-63.99	118.28	TH94-GC1509			51	1	49		-3198	Nagao2002	https://doi.org/10.2183/pjab.78.19	S1	Unconsolidated sediments	The temperature gradient was measured with the 5 to 8 meter-long probes attached to a gravity corer. Sometimes, temperature gradient data have been seriously affected by some non-steady bottom temperature.
-74.54	168	TH95-GC1604			118	1.2	143		-922	Nagao2002	https://doi.org/10.2183/pjab.78.19	S1	Unconsolidated sediments	The temperature gradient was measured with the 5 to 8 meter-long probes attached to a gravity corer. Sometimes, temperature gradient data have been seriously affected by some non-steady bottom temperature.
-76	167.57	TH95-GC1605			106	1.3	135		-595	Nagao2002	https://doi.org/10.2183/pjab.78.19	S1	Unconsolidated sediments	The temperature gradient was measured with the 5 to 8 meter-long probes attached to a gravity corer. Sometimes, temperature gradient data have been seriously affected by some non-steady bottom temperature.
-76.77	166.87	TH95-GC1606			109	1.1	117		-751	Nagao2002	https://doi.org/10.2183/pjab.78.19	S1	Unconsolidated sediments	The temperature gradient was measured with the 5 to 8 meter-long probes attached to a gravity corer. Sometimes, temperature gradient data have been seriously affected by some non-steady bottom temperature.
-64.37	-65.19	TH96-GC1702			83	0.9	79		-522	Nagao2002	https://doi.org/10.2183/pjab.78.19	S1	Unconsolidated sediments	The temperature gradient was measured with the 5 to 8 meter-long probes attached to a gravity corer. Sometimes, temperature gradient data have been seriously affected by some non-steady bottom temperature.
-63.87	-65.65	TH96-GC1703			76	1.4	107		-451	Nagao2002	https://doi.org/10.2183/pjab.78.19	S1	Unconsolidated sediments	The temperature gradient was measured with the 5 to 8 meter-long probes attached to a gravity corer. Sometimes, temperature gradient data have been seriously affected by some non-steady bottom temperature.
-62.56	-57.84	TH96-GC1707			163	0.8	135		-1564	Nagao2002	https://doi.org/10.2183/pjab.78.19	S1	Unconsolidated sediments	The temperature gradient was measured with the 5 to 8 meter-long probes attached to a gravity corer. Sometimes, temperature gradient data have been seriously affected by some non-steady bottom temperature.
-59.69	-38.9	TH97-GC1801			99	1	103		-2130	Nagao2002	https://doi.org/10.2183/pjab.78.19	S1	Unconsolidated sediments	The temperature gradient was measured with the 5 to 8 meter-long probes attached to a gravity corer. Sometimes, temperature gradient data have been seriously affected by some non-steady bottom temperature.
-59	-49.86	TH97-GC1802			141	1.1	161		-3838	Nagao2002	https://doi.org/10.2183/pjab.78.19	S1	Unconsolidated sediments	The temperature gradient was measured with the 5 to 8 meter-long probes attached to a gravity corer. Sometimes, temperature gradient data have been seriously affected by some non-steady bottom temperature.
-61.74	-50.26	TH97-GC1804			141	1.2	64		-3269	Nagao2002	https://doi.org/10.2183/pjab.78.19	S1	Unconsolidated sediments	The temperature gradient was measured with the 5 to 8 meter-long probes attached to a gravity corer. Sometimes, temperature gradient data have been seriously affected by some non-steady bottom temperature.
-62	-52	TH97-GC1805			70	1.2	82		-2834	Nagao2002	https://doi.org/10.2183/pjab.78.19	S1	Unconsolidated sediments	The temperature gradient was measured with the 5 to 8 meter-long probes attached to a gravity corer. Sometimes, temperature gradient data have been seriously affected by some non-steady bottom temperature.
-60.18	-55.5	TH97-GC1806			89	1.1	101		-3531	Nagao2002	https://doi.org/10.2183/pjab.78.19	S1	Unconsolidated sediments	The temperature gradient was measured with the 5 to 8 meter-long probes attached to a gravity corer. Sometimes, temperature gradient data have been seriously affected by some non-steady bottom temperature.
-62.45	67.59	TH99-GC2001			51	0.8	41		-4277	Nagao2002	https://doi.org/10.2183/pjab.78.19	S1	Unconsolidated sediments	The temperature gradient was measured with the 5 to 8 meter-long probes attached to a gravity corer. Sometimes, temperature gradient data have been seriously affected by some non-steady bottom temperature.
-59.85	64.81	TH99-GC2002			89	0.8	68		-4642	Nagao2002	https://doi.org/10.2183/pjab.78.19	S1	Unconsolidated sediments	The temperature gradient was measured with the 5 to 8 meter-long probes attached to a gravity corer. Sometimes, temperature gradient data have been seriously affected by some non-steady bottom temperature.
-62.07	74.24	TH99-GC2003			50	0.9	46		-3959	Nagao2002	https://doi.org/10.2183/pjab.78.19	S1	Unconsolidated sediments	The temperature gradient was measured with the 5 to 8 meter-long probes attached to a gravity corer. Sometimes, temperature gradient data have been seriously affected by some non-steady bottom temperature.
-63.75	64.31	TH99-GC2005			49	1.1	54		-4124	Nagao2002	https://doi.org/10.2183/pjab.78.19	S1	Unconsolidated sediments	The temperature gradient was measured with the 5 to 8 meter-long probes attached to a gravity corer. Sometimes, temperature gradient data have been seriously affected by some non-steady bottom temperature.
-66	73.12	TH99-GC2006			55	1.2	66		-2565	Nagao2002	https://doi.org/10.2183/pjab.78.19	S1	Unconsolidated sediments	The temperature gradient was measured with the 5 to 8 meter-long probes attached to a gravity corer. Sometimes, temperature gradient data have been seriously affected by some non-steady bottom temperature.
-65.14	75.12	TH99-GC2009			60	1.1	67		-3122	Nagao2002	https://doi.org/10.2183/pjab.78.19	S1	Unconsolidated sediments	The temperature gradient was measured with the 5 to 8 meter-long probes attached to a gravity corer. Sometimes, temperature gradient data have been seriously affected by some non-steady bottom temperature.
-70.5833	-60.9333	Dolleman Island 1	0	133			100			Nicholls&Paren1993	https://doi.org/10.1175/1520-0442(1993)006<0141:ETAMRU>2.0.CO;2	I1	Ice borehole	State that 55 mW/m² more likely
-70.5	-65.0167	Dyer Plateau 2	0	108			100			Nicholls&Paren1993	https://doi.org/10.1175/1520-0442(1993)006<0141:ETAMRU>2.0.CO;2	I1	Ice borehole
-90	0	AMANDA South P	0	2345			61	1		Price2002	https://doi.org/10.1073/pnas.082238999	I3	Ice borehole	calculate heat transfer down to base at 2810
-62.4	-43.45	113-695A		313	50	1.14	64			Prinbow2000	https://doi.org/10.1594/PANGAEA.808898, http://www-odp.tamu.edu/publications/heatflow/	R2	Bedrock borehole	A
-61.8	-42.93	113-696B		144	53		73			Prinbow2000	https://doi.org/10.1594/PANGAEA.808898, http://www-odp.tamu.edu/publications/heatflow/	R2	Bedrock borehole	B - thermal conductivity insufficient
-50.2	73.032	119-737A		277	99		88			Prinbow2000	https://doi.org/10.1594/PANGAEA.808898, http://www-odp.tamu.edu/publications/heatflow/	R2	Bedrock borehole	B - variations of temperature gradient, flow?
-61.6	80.595	119-744A		176	40		44			Prinbow2000	https://doi.org/10.1594/PANGAEA.808898, http://www-odp.tamu.edu/publications/heatflow/	R2	Bedrock borehole	B - variations of temperature gradient
-59.6	85.854	119-745B		178	77		67			Prinbow2000	https://doi.org/10.1594/PANGAEA.808898, http://www-odp.tamu.edu/publications/heatflow/	R2	Bedrock borehole	A
-54.8	76.794	120-747A		123	39		49			Prinbow2000	https://doi.org/10.1594/PANGAEA.808898, http://www-odp.tamu.edu/publications/heatflow/	R2	Bedrock borehole	B - variations of temperature gradient
-58.4	78.998	120-748B		173	41		68			Prinbow2000	https://doi.org/10.1594/PANGAEA.808898, http://www-odp.tamu.edu/publications/heatflow/	R2	Bedrock borehole	C - variations of temperature gradient
-53.18	5.13	177-1094A		150	6		5			Prinbow2000	https://doi.org/10.1594/PANGAEA.808898, http://www-odp.tamu.edu/publications/heatflow/	R2	Bedrock borehole	C - Tnew, variations of temperature gradient, flow?
-67.567	-76.963	178-1096B		130	52		83			Prinbow2000	https://doi.org/10.1594/PANGAEA.808898, http://www-odp.tamu.edu/publications/heatflow/	R2	Bedrock borehole	A - revised estimate
-64.528	-64.208	178-1098B		45	107		69			Prinbow2000	https://doi.org/10.1594/PANGAEA.808898, http://www-odp.tamu.edu/publications/heatflow/	R1	Bedrock borehole	A - revised estimate
-64.945	-64.315	178-1099A		65	70		49			Prinbow2000	https://doi.org/10.1594/PANGAEA.808898, http://www-odp.tamu.edu/publications/heatflow/	R1	Bedrock borehole	B - revised estimate, thermal conductivity insufficient
-64.372	-70.262	178-1101A		115	87		87			Prinbow2000	https://doi.org/10.1594/PANGAEA.808898, http://www-odp.tamu.edu/publications/heatflow/	R2	Bedrock borehole	A - revised estimate
-77.83	166.675	Hut Point Peninsula	1.52	7.47	79.7	1.73	164	60		Risk&Hochstein1974	https://doi.org/10.1080/00288306.1973.10421586	R1	Bedrock borehole	long-term (2,4 years) bedrock borehole temperature observation
-77.85	166.8	Pram Point at Scott Base	0.3	0.91	70.5	2.092	167.47			Robertson&McDonald1962	https://www.tandfonline.com/doi/abs/10.1080/00288306.1962.10417639		Electrical resistivity	converted from 40µcal/cm²sec
-78.45	106.87	Vostok		2755		2.55	53			Salamatin1998	https://doi.org/10.1029/97JD02253	I3	Ice borehole
-77.12	176.728	HF301				1.36	73		-638	Sato1984	https://doi.org/10.1594/PANGAEA.807681, https://nipr.repo.nii.ac.jp/?action=repository_uri&item_id=1642&file_id=18&file_no=1	S1	Unconsolidated sediments
-77.1117	178.035	HF302				1.42	111		-597	Sato1984	https://doi.org/10.1594/PANGAEA.807681, https://nipr.repo.nii.ac.jp/?action=repository_uri&item_id=1642&file_id=18&file_no=1	S1	Unconsolidated sediments
-77.1117	179.003	HF304				1.22	119		-692	Sato1984	https://doi.org/10.1594/PANGAEA.807681, https://nipr.repo.nii.ac.jp/?action=repository_uri&item_id=1642&file_id=18&file_no=1	S1	Unconsolidated sediments
-76.705	179.967	HF305				1.27	114		-602	Sato1984	https://doi.org/10.1594/PANGAEA.807681, https://nipr.repo.nii.ac.jp/?action=repository_uri&item_id=1642&file_id=18&file_no=1	S1	Unconsolidated sediments
-60.7417	-141.127	PC301		6		0.83	116		-4400	Sato1984	https://doi.org/10.1594/PANGAEA.807681, https://nipr.repo.nii.ac.jp/?action=repository_uri&item_id=1642&file_id=18&file_no=1	S1	Unconsolidated sediments
-66.325	-139.512	PC302		8		0.65	68		-827	Sato1984	https://doi.org/10.1594/PANGAEA.807681, https://nipr.repo.nii.ac.jp/?action=repository_uri&item_id=1642&file_id=18&file_no=1	S1	Unconsolidated sediments
-64.1967	-139.748	PC303		7		0.97	67		-3553	Sato1984	https://doi.org/10.1594/PANGAEA.807681, https://nipr.repo.nii.ac.jp/?action=repository_uri&item_id=1642&file_id=18&file_no=1	S1	Unconsolidated sediments
-65.37	-173.873	PC304		6		0.8	16		-3369	Sato1984	https://doi.org/10.1594/PANGAEA.807681, https://nipr.repo.nii.ac.jp/?action=repository_uri&item_id=1642&file_id=18&file_no=1	S1	Unconsolidated sediments
-65.37	-173.863	PC304A		4		0.83	8		-3370	Sato1984	https://doi.org/10.1594/PANGAEA.807681, https://nipr.repo.nii.ac.jp/?action=repository_uri&item_id=1642&file_id=18&file_no=1	S1	Unconsolidated sediments
-77.7581	165.277	ANDRILL AND-2A	0	1138	51.9	1.57	81.5			Schröder2011	https://doi.org/10.1130/ges00690.1	R3	Bedrock borehole
-77.5833	164.383	MSSTS 1	0	140	35	2?	70			Sissons1980	http://nzetc.victoria.ac.nz/tm/scholarly/tei-VUW1979-80Anta-t3.html	R1	Bedrock borehole	"Absolute values of temperature are known to be in error but the estimate of temperature gradient is not thought to be badly affected. "
-79.43	-163.33	Roosevelt southwest					70			Thomas1980	https://doi.org/10.3189/S0022143000010273		Glaciological model	along profile across Roosevelt island
-79.099	-161.27	Roosevelt northeast					50			Thomas1980	https://doi.org/10.3189/S0022143000010273		Glaciological model	along profile across Roosevelt island
-74	125.15	Lake Concordia				2.1	50			Tikku2005	https://doi.org/10.3189/172756505781829494		Radar
-54	-69	Fuego		2463	32	3.01	96			Uyeda1982	https://doi.org/10.1594/PANGAEA.806043	R3	Bedrock borehole
-53.1897	-58.7608	U1534		<115,7			49		-605	Weber2019	https://iodp.tamu.edu/scienceops/sitesumm/382/382_ss1534.html	R2	Bedrock borehole	contourite driftdeposited under an evolving bottom current regime
-53.1915	-58.6433	U1535					41		-647	Weber2019	https://iodp.tamu.edu/scienceops/sitesumm/382/382_ss1535.html	R1	Bedrock borehole
-57.442	-43.3578	U1538							-3130	Weber2019	https://iodp.tamu.edu/scienceops/sitesumm/382/382_ss1538.html		Bedrock borehole	No GHF value given or enough information to estimate. "Formation temperature measurements were taken with Cores U1538A-6H, 9H, 12H, 15H, and 18H with the advanced piston corer temperature tool (APCT-3), yielding temperatures of 4.85°–13.8°C."
-77.0893	164.499	CIROS-1	150	600	40	2	80			White1989	https://doi.org/10.1594/PANGAEA.807847	R2	Bedrock borehole
-66.0333	-64.0667	LARISSA Site Beta, Bruce Plateau	2.5	420.94			80			Zagorodnov2012	https://doi.org/10.5194/tc-6-675-2012	I2	Ice borehole
-59.2333	-19.7333	IO15-4		10		0.64	64		-4282	Zlotnicki1980	https://doi.org/10.1029/GL007i006p00421	S1	Unconsolidated sediments	bot (m) from depths in https://doi.org/10.1029/GL007i006p00421 Fig. 3
-59.8	-13.4833	IO15-5		7		0.72	30		-4031	Zlotnicki1980	https://doi.org/10.1029/GL007i006p00421	S1	Unconsolidated sediments	bot (m) from depths in https://doi.org/10.1029/GL007i006p00421 Fig. 4
-60.5833	-3.6667	IO15-8		12		0.72	49		-5229	Zlotnicki1980	https://doi.org/10.1029/GL007i006p00421	S2	Unconsolidated sediments	bot (m) from depths in https://doi.org/10.1029/GL007i006p00421 Fig. 5
-64.9667	-7.4667	IO15-11		3		0.93	41		-5060	Zlotnicki1980	https://doi.org/10.1029/GL007i006p00421	S1	Unconsolidated sediments	bot (m) from depths in https://doi.org/10.1029/GL007i006p00421 Fig. 6
-70.65	-21.5833	IO15-39		10		0.98	60		-4398	Zlotnicki1980	https://doi.org/10.1029/GL007i006p00421	S2	Unconsolidated sediments	bot (m) from depths in https://doi.org/10.1029/GL007i006p00421 Fig. 7
-69.9833	-26.05	IO15-40		5		0.96	84		-4549	Zlotnicki1980	https://doi.org/10.1029/GL007i006p00421	S1	Unconsolidated sediments	bot (m) from depths in https://doi.org/10.1029/GL007i006p00421 Fig. 8
-63.1167	-20.0833	IO15-47		12		0.88	57		-4977	Zlotnicki1980	https://doi.org/10.1029/GL007i006p00421	S2	Unconsolidated sediments	bot (m) from depths in https://doi.org/10.1029/GL007i006p00421 Fig. 9
-62.9833	-19.7333	IO15-47A		12		0.88	34		-4941	Zlotnicki1980	https://doi.org/10.1029/GL007i006p00421	S2	Unconsolidated sediments	bot (m) from depths in https://doi.org/10.1029/GL007i006p00421 Fig. 10
-62	-20	IO15-48		12		0.88	24		-4977	Zlotnicki1980	https://doi.org/10.1029/GL007i006p00421	S2	Unconsolidated sediments	bot (m) from depths in https://doi.org/10.1029/GL007i006p00421 Fig. 11
-61.1	-19.85	IO15-49		10		0.81	84		-4764	Zlotnicki1980	https://doi.org/10.1029/GL007i006p00421	S2	Unconsolidated sediments	bot (m) from depths in https://doi.org/10.1029/GL007i006p00421 Fig. 12
-66.25	-33.0667	IO15-52		11		0.86	64		-4933	Zlotnicki1980	https://doi.org/10.1029/GL007i006p00421	S2	Unconsolidated sediments	bot (m) from depths in https://doi.org/10.1029/GL007i006p00421 Fig. 13
-64.0667	-36.95	IO15-55		6		1.25	175		-4797	Zlotnicki1980	https://doi.org/10.1029/GL007i006p00421	S2	Unconsolidated sediments	bot (m) from depths in https://doi.org/10.1029/GL007i006p00421 Fig. 14
-63.1	-38.45	IO15-56		8		1.03	105		-4495	Zlotnicki1980	https://doi.org/10.1029/GL007i006p00421	S2	Unconsolidated sediments	bot (m) from depths in https://doi.org/10.1029/GL007i006p00421 Fig. 15
-55.65	-41.1667	IO15-64		6		0.87	81		-3458	Zlotnicki1980	https://doi.org/10.1029/GL007i006p00421	S2	Unconsolidated sediments	bot (m) from depths in https://doi.org/10.1029/GL007i006p00421 Fig. 16
