# Supplementary material for: Review article: Geothermal heat flow in Antarctica: current and future directions
Source: Copernicus journal article supplement (doi:10.5194/tc-14-3843-2020), 2020-11-10
Supplement: Supplementary file 1 [file tc-14-3843-2020-supplement.zip]

# Qualitative Data Quality Evaluation Parameters

Grade \*1 = Lowest reliability, \*2 = Intermediate reliability, \*3 = Highest reliability

| Method                        | Grade | Requirements                                                                                                                                                                                                                                                                                                                       |
|-------------------------------|-------|------------------------------------------------------------------------------------------------------------------------------------------------------------------------------------------------------------------------------------------------------------------------------------------------------------------------------------|
| Bedrock Borehole              | R1    | Derived from bedrock borehole temperature profile. No specific requirements or information on depth, location, or other variables.                                                                                                                                                                                                 |
|                               | R2    | Proven stable temperature profile.<br>Maximum borehole depth greater than 90 m.                                                                                                                                                                                                                                                    |
|                               | R3    | Proven stable temperature profile.<br>Maximum borehole depth greater than 1,000 m.<br>Low possibility of local temperature perturbations (e.g. hydrothermal circulation; active or residual basal shear heating from the ice sheet; temperature profile not steady state).                                                         |
| Ice Borehole                  | I1    | Derived from ice borehole temperature profile. No specific requirements or information on depth, location, or other variables.                                                                                                                                                                                                     |
|                               | I2    | Ice sheet frozen to the bed.<br>Proven stable temperature profile.<br>Maximum borehole depth greater than 600 m.                                                                                                                                                                                                                   |
|                               | I3    | Ice sheet frozen to the bed.<br>Proven stable temperature profile.<br>Maximum borehole depth greater than 1,000 m.<br>Low possibility of local temperature perturbations (e.g. hydrothermal circulation; active or residual basal shear heating from the ice sheet; temperature profile not steady state).                         |
| Unconsolidated Sediment Probe | S1    | Derived from unconsolidated sediment temperature profile. No specific requirements or information on depth, location, or other variables.                                                                                                                                                                                          |
|                               | S2    | Proven stable temperature profile.<br>Maximum probe depth greater than 3 m.<br>Marine measurements from water depths greater than 500 m.                                                                                                                                                                                           |
|                               | S3    | Proven stable temperature profile.<br>Maximum probe depth greater than 5 m.<br>Marine measurements from water depths greater than 1,000 m.<br>Low possibility of local temperature perturbations (e.g. hydrothermal circulation; active or residual basal shear heating from the ice sheet; temperature profile not steady state). |

## **Justification of depth requirements**

### **R2 90 m bedrock borehole depth requirement**

Temperatures from the Dry Valley Drilling Project provided estimates of “equilibrium” gradient only when deeper than 90 m (Decker, 1974; Decker et al., 1975; Pruss et al., 1974).

### **R3 1,000 m bedrock borehole depth requirement**

Based on the skin depth calculations (Fig. 4 in the manuscript. Carslaw and Jaeger, 1959; Wangen, 2010), temperature variations of a one cycle periodicity less than 100,000 years do not penetrate below ~1,000 m in ice or rock.

### **I2 300 m ice borehole depth requirement**

Based on the skin depth calculations (Fig. 4 in the manuscript), temperature variations of a one cycle periodicity less than 10,000 years do not penetrate below ~300 m in ice or rock.

### **I3 1,000 m ice borehole depth requirement**

Based on the skin depth calculations (Fig. 4 in the manuscript), temperature variations of a one cycle periodicity less than 100,000 years do not penetrate below ~1,000 m in ice or rock.

### **S2 3 m probe depth requirement**

3 m is the penetration depth of ~12 kyr thermal variability at 400 m water depth calculated by Dziadek et al. (2019). This skin depth increases at shallower water depths, and thins at greater depths.

### **S2 500 m water depth requirement**

Water column temperatures are more variable in depths shallower than ~500 m, although this depth is variable (Dziadek et al., 2019; Wåhlin et al., 2010).

### **S3 5 m probe depth requirement**

5 m exceeds the maximum skin depth penetrated into the sediments by sea floor temperature variations calculated by Dziadek et al. (2019). Temperature variations are within the measurement error.

### **S3 1,000 m water depth requirement**

Negligible sub-annual temperature variability at depths greater than 1,000 m (Dziadek et al., 2019).

---

## **References**

- Carslaw, H. S. and Jaeger, J. C.: Conduction of heat in solids, Oxf. Clarendon Press 1959 2nd Ed, 1959.
- Decker, E. R.: Preliminary geothermal studies of the Dry Valley Drilling Project holes at McMurdo Station, Lake Vanda, Lake Vida, and New Harbor, Antarctica, Bull.-Dry Val. Drill. Proj. DVDP, 4, 22–23, 1974.
- Decker, E. R., Baker, K. H. and Harris, H.: Geothermal studies in the Dry Valleys and on Ross Island, Antarct. J., 10(4), 176, 1975.
- Dziadek, R., Gohl, K. and Kaul, N.: Elevated geothermal surface heat flow in the Amundsen Sea Embayment, West Antarctica, Earth Planet. Sci. Lett., 506, 530–539, 2019.
- Pruss, E. F., Decker, E. R. and Smithson, S. B.: Preliminary temperature-measurements at DVDP holes 3, 4, 6, and 8, Antarct. J. U. S., 9(4), 133–134, 1974.
- Wåhlin, A. K., Yuan, X., Björk, G. and Nohr, C.: Inflow of warm Circumpolar Deep Water in the central Amundsen shelf, J. Phys. Oceanogr., 40(6), 1427–1434, 2010.
- Wangen, M.: Physical principles of sedimentary basin analysis, Cambridge University Press, Cambridge, UK., 2010.
