# Supplementary material for: Review article: Geothermal heat flow in Antarctica: current and future directions
Source: Copernicus journal article supplement (doi:10.5194/tc-14-3843-2020), 2020-11-10
Supplement: Supplementary file 2 [file tc-14-3843-2020-supplement.zip]

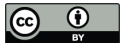

## *Supplement of*

# **Review article: Geothermal heat flow in Antarctica: current and future directions**

**Alex Burton-Johnson et al.**

*Correspondence to:* Alex Burton-Johnson (alerto@bas.ac.uk)

- tc-14-3843-2020-supplement-title-page.pdf
- GHF Database
  - ANT\_GHF\_DB\_V003.xlsx
  - Data Quality Evaluation.pdf
  - README.txt
- Geophysical GHF Summary Statistics Maps
  - Mean.tfw
  - Mean.tif
  - Mean.tif.aux.xml
  - Mean.tif.xml
  - Standard Deviation.tfw
  - Standard Deviation.tif
  - Standard Deviation.tif.aux.xml
  - Standard Deviation.tif.xml

The copyright of individual parts of the supplement might differ from the CC BY 4.0 License.
